## A comprehensive landscape of the zinc-regulated human proteome

Nils Burger<sup>1,2</sup>, Melanie J. Mittenbühler<sup>1,2\*</sup>, Haopeng Xiao<sup>1,2\*</sup>, Sanghee Shin<sup>1,2</sup>, Luiz H.M. Bozi<sup>1,2</sup>, Shelley Wei<sup>1,2</sup>, Hans-Georg Sprenger<sup>1,2</sup>, Yizhi Sun<sup>1,2</sup>, Yingde Zhu<sup>1</sup>, Narek Darabedian<sup>1,2</sup>, Jonathan J. Petrocelli<sup>1,2</sup>, Pedro Latorre-Muro<sup>1,2</sup>, Jianwei Che<sup>1,3</sup> & Edward T. Chouchani<sup>1,2,#</sup>

<sup>1</sup>Department of Cancer Biology, Dana–Farber Cancer Institute, Boston, MA, USA.

<sup>2</sup>Department of Cell Biology, Harvard Medical School, Boston, MA, USA.

<sup>3</sup>Department of Biological Chemistry and Molecular Pharmacology, Harvard Medical School, Boston, MA, USA

# Corresponding author: [edwardt\\_chouchani@dfci.harvard.edu](mailto:edwardt_chouchani@dfci.harvard.edu)

\*These authors contributed equally

### Summary

Zinc is an essential micronutrient that regulates a wide range of physiological processes, principally through Zn<sup>2+</sup> binding to protein cysteine residues. Despite being critical for modulation of protein function, for the vast majority of the human proteome the cysteine sites subject to regulation by Zn<sup>2+</sup> binding remain undefined. Here we develop ZnCPT, a comprehensive and quantitative mapping of the zinc-regulated cysteine proteome. We define 4807 zinc-regulated protein cysteines, uncovering protein families across major domains of biology that are subject to either constitutive or inducible modification by zinc. ZnCPT enables systematic discovery of zinc-regulated structural, enzymatic, and allosteric functional domains. On this basis, we identify 52 cancer genetic dependencies subject to zinc regulation, and nominate malignancies sensitive to zinc-induced cytotoxicity. In doing so, we discover a mechanism of zinc regulation over Glutathione Reductase (GSR) that drives cell death in GSR-dependent lung cancers. We provide ZnCPT as a resource for understanding mechanisms of zinc regulation over protein function.

### Introduction

Metal ions are essential micronutrients that play critical roles in all aspects of cellular biology. The zinc ion (Zn<sup>2+</sup>) is among the most widely employed metal cofactors in the cell and the vast majority of cellular zinc is bound to proteins<sup>1,2</sup>. Zinc binds to proteins as a constitutive structural component, to act as a catalyst, or to otherwise regulate target function<sup>1,3</sup>(**Figure 1A**). These interactions are thought to be extremely prevalent, as it is predicted that upwards of 10% of the human proteome could be regulated by zinc binding<sup>4,5</sup>. Within a cell, local zinc concentrations are tightly regulated by zinc transporters as well as zinc storage and carrier proteins, which can drive inducible interactions of zinc with protein targets. As such, zinc binding to proteins is implicated in a wide range of biological processes<sup>1–3</sup>.

Despite the widespread importance of zinc regulation over biological processes, there is a dearth of information regarding the specific protein modifications that explain the mechanistic basis for this activity. To date, identification of zinc-binding sites on proteins has relied on biophysical analyses of individual targets and prediction tools based on conserved sequence features of known zinc-binding proteins<sup>4–6</sup>. Comprehensive proteome-wide analysis of zinc binding to proteins is lacking because of technical challenges due to the non-covalent nature of coordination bonds between protein residues and zinc. Specifically, zinc binding to proteins most frequently involves chelation with at least one cysteine thiol<sup>6,7</sup>, and methods for assessing these modifications on protein cysteine residues to date covered a small proportion of the cysteine proteome<sup>8,9</sup>. For this reason, there has been no systematic mapping of the zinc binding proteome.

Herein we develop a cysteine derivatization and enrichment method coupled with multiplexed proteomics to provide a quantitative and thorough landscape of the zinc-regulated cysteine proteome. This ZnCPT dataset quantifies zinc modification status across over 52,000 cysteines in the human proteome. The zinc modification

51 state of most of these sites had not previously been determined, so this landscape represents by far the deepest  
52 examination of the zinc-regulated cysteine proteome.

53

54 This compendium allows us to establish and validate distinct zinc-regulated proteins that underlie major aspects  
55 of cell biology. From this dataset, we define a structural basis differentiating protein cysteine thiol features that  
56 facilitate constitutive binding or inducible binding. We identify distinct clusters of the cysteine proteome  
57 constitutively bound by zinc, compared to those, subject to dynamic inducible modification by zinc. In doing so,  
58 we identify zinc-regulated structural, enzymatic, and allosteric functional domains on a range of cancer  
59 dependencies to nominate malignancies sensitive to zinc-induced cytotoxicity. We discover a mechanism of zinc-  
60 driven control over Glutathione Reductase (GSR) that drives cell death in GSR-dependent lung cancer cells.  
61 Together, these findings provide a comprehensive analysis of the zinc-regulated human proteome.

62

## 63 Results

64

65 **Cysteine-Reactive Phosphate Tags (CPTs) Provide Deep Coverage and Quantification of the zinc-bound**  
66 **Cysteine Proteome.** Zinc binding to proteins most typically involves coordination with at least one cysteine  
67 thiolate sidechain<sup>6,7</sup>. Generally, quantification of cysteine thiolate modifications can be determined by cysteine  
68 derivatization and quantification approaches<sup>10</sup>. However, the non-covalent nature of cysteine-zinc interactions  
69 requires determination of zinc binding to proteins under native conditions to preserve zinc coordination. We were  
70 inspired by recent mass spectrometry methodologies that determine zinc binding to protein cysteine residues  
71 under native conditions<sup>8,9</sup>. In particular, the elegant strategy developed by Pace & Weerapana<sup>8</sup> determines  
72 modification of protein cysteines by zinc under native conditions. To date, these methods achieve low proteome  
73 coverage (~900 sites, ~ 0.0034% of the cysteine proteome), due to the low abundance of cysteine residues relative  
74 to other amino acids, and a dearth of effective enrichment strategies for cysteine containing peptides. As such,  
75 quantification of protein cysteine modification by zinc across the majority of the proteome has been a technical  
76 hurdle.

77

78 We recently developed an approach to comprehensively identify and quantify the extent of reversible  
79 modification of tens of thousands of cysteines across the proteome in a single experiment<sup>10</sup>. This method relies on  
80 a cysteine labeling and enrichment reagent for quantitative proteomics, called cysteine-reactive phosphate tags  
81 (CPT). CPTs facilitate >99% enrichment of cysteine-containing peptides using metal affinity chromatography  
82 (IMAC) enrichment, allowing for unprecedentedly deep quantitative mapping of the cysteine proteome. We  
83 posited that CPTs could be deployed to assess quantitative engagement of zinc simultaneously with tens of  
84 thousands of cysteines. We devised a strategy combining CPT with tandem mass tag (TMT)-multiplexed  
85 chemoproteomics<sup>10,11</sup>, to quantify zinc engagement with over 52,000 unique cysteines across the human proteome  
86 (**Figure 1B, C & Supplementary Table 1**).

87

88 We used HCT116 cells as this system captures a large proportion of the human proteome<sup>12,13</sup>, allowing for  
89 assessment of zinc engagement with over 10,000 proteins (**Supplementary Table 1**). We treated native HCT116  
90 cell lysates with well-established manipulations to titrate zinc binding to proteins (**Figure 1D; Figure S1A**)<sup>8,14-16</sup>.  
91 Following these interventions, we applied a labeling strategy for proteome-wide quantification of zinc binding to  
92 protein cysteines, combined with TMT multiplexing<sup>17,18</sup> that allows for simultaneous analysis of up to 18  
93 biological replicates in a single experiment (**Figure 1B**).

94

95 To define constitutively zinc-bound protein cysteines, we mapped protein cysteine residues that become  
96 accessible to CPT modification following treatment with the zinc chelator N,N,N',N'-tetrakis(2-pyridinylmethyl)-  
97 1,2-ethanediamine (TPEN; **Figure 1D**). In parallel, we defined constitutively metal-bound cysteines by mapping  
98 cysteine residues that become accessible to CPT modification following treatment with the broad metal chelator  
99 Ethylenediaminetetraacetic acid (EDTA) (**Figure 1D**). Finally, we determined protein cysteines amenable to  
100 inducible zinc modification by defining those that are blocked from CPT labelling following treatment with ZnCl<sub>2</sub>  
101 (**Figure 1D**). We applied a physiologic concentration of zinc at 10 μM, which is well below total cellular zinc

102 (200-300  $\mu\text{M}^2$ ) and falls near plasma zinc concentration range (11-24  $\mu\text{M}^{19}$ ). Since local zinc concentrations are  
103 dynamic and local spikes in zinc concentration are widely reported, we estimated the concentration used here to  
104 be within a conservative physiologic range for inducible zinc binding.

105  
106 **Population characteristics of the zinc-binding proteome.** The vast majority of cysteine sites mapped in our  
107 analyses have not been previously experimentally assessed for zinc binding. The major factor contributing to the  
108 high proportion of previously unmapped sites is that the CPT method provides over an order of magnitude  
109 improvement in cysteine-peptide enrichment compared to previous technologies<sup>10</sup> (**Figure 1C**). Of the entire  
110 detected cysteine proteome (54,900), 52,665 unique cysteines were quantified.

111  
112 Global quantification of zinc binding to protein cysteines was remarkably consistent across biological replicates,  
113 with the large majority of cysteines exhibiting reproducible extents of modification (**Figure S1B**). Constitutive  
114 zinc- and metal-binding populations clustered closely and distinctly from control and inducible zinc-binding  
115 populations. Replicate samples showed extremely high reproducibility of zinc binding quantification across  
116 cysteine sites and the same was observed across biological replicates for zinc treated samples (**Figure S2A-E**).

117  
118 First, we curated the ZnCPT dataset to define population characteristics of the cysteine proteome that participates  
119 in (i) constitutive zinc-binding, (ii) non-zinc metal binding, and (iii) inducible zinc-binding. Of the entire  
120 quantified cysteine proteome (52,665), we identified 3,698 constitutively zinc bound cysteines, and 4,328  
121 constitutively metal bound cysteines (**Figure 1E-G**). Over 10 % of quantified proteins contained at least one  
122 constitutive zinc-binding cysteine, which aligns with bioinformatic estimates of the proportion of zinc-binding  
123 proteins in the human proteome<sup>4,5</sup>. In addition, we identified 1,358 cysteines that could be inducibly modified by  
124 zinc (**Figure 1H**). Notably, cysteine sites responding to TPEN showed a very similar response upon EDTA  
125 treatment, which confirms that zinc is the predominant protein-bound metal coordinated by cysteine residues  
126 (**Figure 2A**). In contrast, the number of cysteines presenting with increased accessibility upon EDTA but not  
127 TPEN treatment, indicating non-zinc metal binding sites, was comparably low.

128  
129 As expected, constitutive metal binding cysteine sites were the largest population, which were predominantly  
130 populated by constitutive zinc-bound cysteines. Interestingly, a large majority of cysteines amenable to inducible  
131 zinc modification represented a completely distinct population of the cysteine proteome (**Figure 2B, S2F, G**).  
132 These data suggest that distinct proximal amino acid environments govern capacity for inducible zinc binding,  
133 compared to constitutive zinc binding. The structural basis for this is investigated in a later section. Of note, we  
134 also defined a distinct population of cysteines that exhibited increased solvent accessibility as a consequence of  
135 zinc addition, indicative of a distal effect of zinc binding, likely induced by structural rearrangements resulting  
136 from the zinc binding event. As ZnCPT could not identify the actual zinc binding site in this case, we did not  
137 attempt to further investigate cysteines falling into this category, however they are annotated in **Supplementary**  
138 **Table 1**.

139  
140 We next leveraged the depth of the mapped zinc binding cysteine proteome to generate population-level analyses  
141 with subcellular resolution (**Figure 2C**)<sup>20,21</sup>. The constitutive zinc-binding proteome was enriched with nuclear  
142 proteins, in line with a significant over-representation of DNA binding proteins (transcription factors, regulators  
143 of gene expression) with characteristic structural zinc finger domains. Conversely, there was a de-enrichment of  
144 cytoplasmic, Golgi, mitochondrial, and plasma membrane proteins. Interestingly, proteins inducibly regulated by  
145 zinc exhibited a distinct subcellular distribution. Inducible zinc targets were de-enriched in the nucleus, and were  
146 instead found predominantly vesicular proteins and proteins annotated to be localized within the Endo-/  
147 Lysosomal system, as well as the endoplasmic reticulum. Together, these data indicate that a substantially distinct  
148 proteome is targeted by dynamic zinc binding when compared to constitutive zinc-binding proteins. 15.7% of all  
149 detected proteins contained at least one cysteine residue that was constitutively modified by zinc while fewer than  
150 5% carried three or more highly modified sites (**Figure 2D, S2H**). For inducible zinc binding, we observed that  
151 more than 5% of proteins contained at least one cysteine that was dynamically modified by zinc (**Figure S2H**).

152

153 **ZnCPT recapitulates the established zinc-binding proteome.** We next examined if ZnCPT recapitulated the  
154 cumulative historically determined zinc binding proteins found in the literature. We selected the ZincBind  
155 dataset<sup>6</sup>, a compendium of all available structures of zinc binding proteins, as the to-date most comprehensive  
156 experimentally validated dataset. Overall, ~69 % of previously determined zinc binding proteins were reproduced  
157 by the ZnCPT constitutive binding dataset (TPEN) (**Figure 2E**). Conversely, a further ~20 % were recapitulated  
158 by the ZnCPT inducible zinc binding dataset (ZnCl<sub>2</sub>) (**Figure 2F**). Together, the entire ZnCPT dataset  
159 recapitulated ~70 % of historically accumulated evidence of zinc binding proteins. While ZnCPT reproduced  
160 most previously observed zinc binding proteins, some were not recapitulated in this dataset. Some likely reasons  
161 for lack of complete overlap include the possibility that conditions used to determine zinc binding of recombinant  
162 proteins during structural determination may not recapitulate in a native cellular environment. It is also possible  
163 that removal of zinc from proteins in ZnCPT may result in structural rearrangements or aggregation of some  
164 proteins which may preclude their analysis by ZnCPT.

165  
166 Importantly, fewer than 5 % of zinc binding cysteines identified by ZnCPT have been denoted by the ZincBind  
167 dataset (**Figure 2E, F**). This indicates that the ZnCPT compendium substantially expands the experimentally  
168 validated cysteine proteome. Furthermore, most inducible zinc binding proteins were not found in ZincBind,  
169 underlining the potential of ZnCPT as powerful resource to define the largely undiscovered realm of dynamic zinc  
170 binding proteins.

171  
172 **ZnCPT accurately reports zinc regulation of established zinc-binding proteins.** Individual analysis of the  
173 protein targets of zinc binding allowed us to investigate modes of zinc regulation over established zinc-binding  
174 proteins. We observed many examples of known zinc binding proteins that ZnCPT classified as constitutively  
175 bound by zinc. One prominent example is zinc-finger protein 1 (ZPR1), a highly conserved regulator of growth  
176 factor signaling via receptor tyrosine kinases, cell proliferation, and translational regulation<sup>22-24</sup>. Based on crystal  
177 structures, ZPR1 contains two C4 zinc finger domains (**Figure 3A**). We mapped 6 of these cysteine residues  
178 (C80, C83, C259, C262, C288 and C291) as constitutive zinc binding cysteines that could not be further modified  
179 by exogenous zinc, indicating full zinc occupancy of all cysteine sites. Another example is the NDUF53 subunit  
180 of mitochondrial complex I which contains a structural zinc finger domain and is critical for assembly of complex  
181 I and highly conserved (**Figure 3B**)<sup>25-27</sup>. The zinc is coordinated by three cysteines and one histidine residue, and  
182 we quantified complete constitutive zinc binding at these sites with no changes upon zinc treatment.

183  
184 ZnCPT also identified numerous examples of known non-zinc metal-binding cysteines. For example, the small  
185 GTPase Ran, binds a Mg<sup>2+</sup> ion that is required for stabilizing GDP/GTP binding<sup>28,29</sup>. The two cysteines of Ran  
186 quantified by ZnCPT are occluded by a Mg<sup>2+</sup> ion which helps to coordinate the phosphate groups of a guanine  
187 nucleotide (**Figure 3C**). EDTA, but not TPEN, significantly increased the accessibility of both cysteines,  
188 presumably due to its chelation of the Mg<sup>2+</sup> ion and the resulting destabilization of the nucleotide binding,  
189 resulting in the exposure of both cysteine residues (**Figure 3C**). From this we concluded that ZnCPT  
190 classification correctly identifies known non-zinc metal binding protein targets which contain cysteine residues,  
191 that are occluded as consequence of non-zinc metal coordination.

192  
193 An example of dynamic zinc binding is the metal binding transcription factor MTF1, which ZnCPT identified as  
194 containing six relatively low affinity zinc finger domains to sense free unbound zinc within the cell (**Figure 3D**)<sup>30</sup>.  
195 Elevated zinc levels result in the dynamic binding and stabilisation of MTF1 zinc-finger domains<sup>31,32</sup>, facilitating  
196 its binding to metal response elements (MREs), driving the transcriptional response to elevated zinc<sup>30</sup>. AlphaFill<sup>33</sup>  
197 derived MTF1 structures identified the dynamically regulated cysteines determined by ZnCPT to be those  
198 constituting the six zinc finger domains (**Figure 3D**). These data confirm the validity of the ZnCPT approach to  
199 measure occupancy of dynamic zinc-regulated sites. Generally, we found that under control conditions, many  
200 zinc-inducible sites exhibited partial zinc occupancy and could be further occupied upon ZnCl<sub>2</sub> treatment.  
201 Importantly, even upon treatment with 10 μM ZnCl<sub>2</sub> we did not fully occupy dynamically zinc-regulated sites in  
202 ISCU (detailed further beneath) and MTF1, confirming that the chosen concentration is in a physiologically

203 relevant range for zinc regulation (**Figure 3E**). Together, ZnCPT provides potential in the identification and  
204 characterisation of physiologically relevant dynamic zinc-mediated regulatory events.

205  
206 **Structural and sequence features of the zinc-binding proteome.** ZnCPT comprised the identification of  
207 thousands of novel constitutive and inducible zinc binding sites across the proteome. As a first step, we defined  
208 protein domains subject to zinc binding by mapping Pfam domain annotations to ZnCPT. This identified classic  
209 zinc binding domains as highly enriched, with C2H2 type zinc finger domains dominating (**Figure 4A**) and  
210 demonstrated accuracy of our approach in defining zinc binding on a cysteine site level. Next, we interrogated  
211 primary sequence motifs (+/- 6 positions of quantified cysteine) to identify primary amino acid signatures as  
212 determinants for zinc binding. Highly conserved elements were identified such as vicinal cysteine doublets  
213 involved in zinc coordination and certain amino acid nearby that may play important structural roles such as  
214 glycine (**Figure 4B, S3A**). Notably, similar amino acid signatures were also identified for inducible zinc binding  
215 sites, with additional unique features (**Figure 4C, S3B**). For instance, the prominent lysine residues in inducible  
216 binding compared with constitutive site potentially indicates that local electrostatic interactions could be relevant  
217 for zinc binding to cysteine thiolates, whereas acidic residues might contribute to zinc coordination and prevent  
218 cysteine oxidation.

219  
220 We next examined structural characteristics defining zinc coordination in three dimensions, across the ZnCPT  
221 dataset. We systematically analyzed ZnCPT cysteines using human AlphaFold<sup>69</sup> (AF) structures  
222 (<https://alphafold.ebi.ac.uk/>). This analysis defined the protein microenvironments of cysteines in zinc binding  
223 sites (**Figure 4D**, see methods for details). Consistent with primary sequence motif analysis, some general  
224 features were readily found distinct or shared across constitutive and inducible. The presence of nearby cysteine  
225 residue(s) and histidine is apparent in both types of zinc binding. This is due to typical C2H2, C3H, and C4 zinc  
226 coordination structures in proteins. On the other hand, disulfide bonds suggested by close distance of cysteines  
227 (<3 Å) was much more frequent in inducible sites than constitutive sites.

228  
229 As 3D structures capture coordinating residues distal in sequence space that are impossible to be identified from  
230 short motif analysis, unbiased clustering of the site 3D microenvironment was performed. The hierarchical  
231 structure clearly identified structurally distinct classes for both constitutive and inducible sites, with 10 clusters  
232 for constitutive sites and 6 clusters for inducible sites (**Figure 4D, S3C, D**). For example, amongst constitutive  
233 zinc binding sites, cluster 1 and 4 mostly represented single cysteine sites often embedded by hydrophobic  
234 residues, and cluster 2 was dominated by disulfide structures. It should be noted that disulfide structures predicted  
235 by AF could be in fact more dynamic than a static stable state. Certain structures with two disulfide bonds next to  
236 each other could form C4 coordination for Zn<sup>2+</sup>. Cluster 5 represented the more traditional C2H2 type, while there  
237 were many members in cluster 6 representing C3H coordination. Interestingly, cluster 7 and 8 also contained  
238 mostly C2H2 but with a basic residue such as lysine or arginine and an acidic residue immediately adjacent to the  
239 binding site for cluster 7 and an acidic residue for cluster 8. The relationship can also be clearly seen in the  
240 UMAP plot where cluster 6-8 were clustered together and away from others. Cluster 9 and 10 were dominated by  
241 C4 and C3H, respectively. For inducible zinc binding sites, C3H & C4 were highly represented by cluster 4,  
242 whereas C2H2 were represented by clusters 5 and 6. There were also cases of 6 proximal cysteines in cluster 4,  
243 presumably coordinating 2 Zn<sup>2+</sup> to form a Zn<sub>2</sub>C<sub>6</sub> configuration. These clusters were distant from other clusters in  
244 the UMAP plot (**Figure 4D**), indicating potentially different structural mechanisms. In cluster 1, the zinc binding  
245 site often involved a single cysteine accompanied by an acidic residue and histidine, where water molecules or the  
246 acidic side chain could become the additional coordinating partner upon Zn<sup>2+</sup> binding. In contrast, clusters 2 and 3  
247 were dominated by disulfides. Taken together, this comprehensive analysis provided a structural basis for the  
248 diversity of zinc binding sites including physicochemical determinants of zinc coordination.

249  
250 **The zinc binding cysteine proteome is distinct from the redox-regulated cysteine proteome.** We found that  
251 zinc coordinating cysteines are defined by characteristic structural features that markedly differ from features that  
252 are characteristic for redox regulated cysteines<sup>10</sup>. These data suggest that zinc-regulated and redox-regulated  
253 cysteines are predominantly distinct populations. To examine this, we compared the zinc binding proteome with

254 the recently determined landscape of cysteines subject to reversible redox regulation<sup>10</sup>. Approximately 12,000  
255 unique cysteines were shared across the datasets and conserved across species (human and mouse). Remarkably  
256 we observed that cysteines subject to high degrees of redox modification were largely absent from both the  
257 constitutive and inducible zinc binding cysteine proteome, albeit the overlap of the redox dataset was  
258 proportionally lower for zinc-regulated cysteines compared to non-regulated (**Figure 5A**). This suggests that  
259 cysteine oxidation and zinc binding target distinct populations of the cysteinome. Notably, zinc-binding cysteine  
260 motifs are devoid of a proximal arginine residue<sup>10</sup>, a characteristic feature of redox regulated cysteines, instead  
261 acidic as well as lysine residues mark zinc-binding cysteines (**Figure 4B-D**). Together, this implies that inducible  
262 zinc binding might regulate target cysteines less amenable to oxidation.

263  
264 **Zinc regulates iron-binding proteins.** The large majority of zinc-bound cysteine sites in the ZnCPT dataset had  
265 not been determined previously. As such, we next sought to systematically classify the biological activities of the  
266 zinc-binding proteome. Strikingly, constitutive and inducible zinc binding targets coalesced to largely distinct  
267 biological functions (**Figure 5B, C, Supplementary Table 2**). Protein functions related to nucleic acid and  
268 ubiquitin binding were prominently enriched amongst constitutive zinc-binding proteins (**Figure 5B**). To our  
269 surprise, proteins determined inducible zinc binding appeared enriched for iron binding protein classes, in  
270 addition to others (**Figure 5C, Supplementary Table 2**). Notably, metal binding to proteins is governed by the  
271 individual ligand affinity of metals, as defined in the Irving-Williams series and cellular metal concentrations<sup>35,36</sup>.  
272 Changes in metal homeostasis can therefore result in alternative metalation events. In this context, iron  
273 displacement by zinc is an established feature, directed by the superior ligand affinity of zinc over iron<sup>36,37</sup>. In  
274 total ZnCPT mapped 14 iron binding proteins as inducible zinc binding targets, amongst which iron-dependent  
275 dioxygenases predominated. This protein class is exemplified by EGLN1 (PHD2), a principal component of the  
276 HIF1 $\alpha$  signaling pathway. The enzyme hydroxylates two proline residues within the oxygen-dependent  
277 degradation domains (N-terminal NODD and C-terminal CODD) of HIF1 $\alpha$ , thereby marking its substrate for  
278 ubiquitin-dependent degradation<sup>38,39</sup>. EGLN1 featured pronounced dynamic zinc binding at cysteines known to  
279 coordinate catalytic iron (**Figure 5D**). Indeed, using human recombinant EGLN1, we determined a concentration-  
280 dependent inhibition of prolyl hydroxylation on a synthetic peptide resembling part of the human HIF1 $\alpha$ -CODD  
281 domain, upon ZnCl<sub>2</sub> treatment (**Figure 5D**). These data support an inhibitory mechanism of zinc dependent iron  
282 displacement for this target.

283  
284 ZnCPT also provided systematic insights into modes of dynamic zinc regulation over iron-binding proteins, for  
285 example the mitochondrial *de novo* iron-sulfur cluster (ISC) assembly machinery<sup>40-44</sup>. Zinc has been implicated as  
286 an important cofactor for the ISC assembly machinery, but its physiological role remained obscure<sup>40,43-50</sup>. Zinc  
287 can be coordinated by ISCU residues Cys95, Asp71 and His137 and NFS1 Cys381 (**Figure 5E**)<sup>40,44</sup>. Binding of  
288 ISC assembly activator Frataxin (FXN), displaces the NFS1 loop carrying Cys381 and reorients zinc coordination  
289 to ISCU residues Cys95, Asp71 and Cys138<sup>42,43,51,52</sup>. This possibly primes the complex for a catalytic  
290 cycle<sup>42,43,53,54</sup>. Importantly, iron, but not zinc binding allowed FeS formation by an *in vitro* ISC assembly  
291 complex<sup>53</sup>. ZnCPT quantified both ISCU Cys95 and Cys138 as dynamic zinc binding residues, while NFS1  
292 Cys381 did not appear to bind zinc, supporting a Frataxin-bound intermediary state, awaiting initiation of catalysis  
293 (**Figure 5E**)<sup>43,44,55</sup>. These data provide physiological evidence of dynamic zinc-dependent regulation of ISC  
294 assembly in human cells, which possibly also extends to the wider family of ISC binding proteins<sup>56</sup>.

295  
296 **Systematic functional classification of zinc-regulated oncoproteins.** We reasoned that mapping zinc binding  
297 cysteines onto proteome networks can reveal tandem cysteine zinc modifications that regulate proteins' shared  
298 biological activities. Using enrichment analyses for KEGG pathways we identified numerous protein networks  
299 and protein pathways dominated by zinc-regulated proteins, both constitutive and inducible (**Figure 6A, S4A**).  
300 For instance, ZnCPT correctly identified all constitutive zinc binding subunits of RNA polymerase except for one,  
301 highlighting precision and ultra-deep coverage as strength of this technology (**Figure S4A, B**). Furthermore,  
302 Ubiquitin-mediated proteolysis was highly enriched, with ZnCPT identifying E1 SUMO-activating enzymes and  
303 E3 Ubiquitin/SUMO protein ligases as constitutive zinc binding, in agreement with the evolutionary conservation  
304 of zinc finger domains in ubiquitin/SUMO binding proteins<sup>57,58</sup> (**Figure S4A, C**). Together, these analyses provide

305 a repertoire of functional zinc targets that can be leveraged to define zinc regulation over cellular physiology and  
306 to target zinc-dependent pathways in disease.

307

308 Among the most enriched zinc-regulated proteins we discovered were those involved in regulating tumorigenic  
309 processes. In fact, many well established cancer drivers and cancer dependencies were identified as zinc-regulated  
310 by ZnCPT (**Figure 6A, S4A, D**). The discovery of numerous cancer-related proteins being subject to engagement  
311 by zinc provided an opportunity to nominate cancer dependencies that could be subject to therapeutic regulation  
312 by zinc. To examine this idea systematically, we combined the ZnCPT dataset with DepMap, a comprehensive  
313 collection of genetic dependencies across 1095 cancer cell lines. To identify both common essential cancer  
314 dependencies, as well as cancer cell-specific dependencies, we ranked average Chronos Cancer Dependency  
315 scores and minimum Z-scores (**Figure S5A**). Correlating both scores denoted two major subpopulations that are  
316 zinc-regulated: general essential proteins, and selective cancer dependencies (**Figure 6B, S5B**). From this  
317 analysis, we identified 123 constitutive and 52 inducible zinc-regulated major selective genetic dependencies in  
318 DepMap. We posited that targeting zinc regulation might be a powerful strategy to manipulate the function of  
319 these cancer dependencies, which could regulate therapeutic response in these cancers.

320

321 To further explore this idea, we curated all inducible zinc-regulated cancer dependencies, identifying numerous  
322 zinc-regulated functional domains of established cancer dependencies such as Glutathione Reductase (GSR), GTP  
323 cyclohydrolase 1 (GCH1), Delta-1-pyrroline-5-carboxylate synthase (ALDH18A1), Riboflavin Transporter  
324 (SLC52A2), 5-demethoxyubiquinone hydroxylase (COQ7), Peroxiredoxin 1 (PRX1), and Metal Regulatory  
325 Transcription Factor 1 (MTF1) (**Figure 6C**). From this analysis we selected Glutathione Reductase (GSR) as the  
326 most prominent zinc-regulated selective cancer dependency (**Figure 6B, C**). In particular, we found that among  
327 lung cancers, SKMES1 lung cancer cells display by far the highest selective GSR dependency (**Figure S5C**). To  
328 gain a deeper understanding of the potential role of GSR in lung cancer, we assessed the expression and protein  
329 abundance<sup>59</sup> of GSR across 685 cancer cell lines and determined a strong correlation (**Figure S5D**). Importantly,  
330 we discerned an elevation in GSR expression in lung compared to other cancer cell lines, which was driven by a  
331 population of high GSR-expressing lung cancer types. Notably, these cancers also exhibited elevated expression  
332 of GCLC and GCLM, which catalyze the rate-limiting reaction of GSH synthesis, as well as G6PD and PGD,  
333 both central NADPH-producing enzymes of the pentose phosphate pathway (**Figure S5D**). These findings were  
334 complemented by a relative elevation of GSH, GSSG and NADP levels<sup>60</sup>, suggesting that glutathione redox  
335 metabolism is critical for GSR<sup>High</sup> lung cancers, possibly to protect against elevated oxidative stress. This  
336 motivated us to further elucidate the pronounced relation between GSR and select lung cancers as functional  
337 targets of zinc.

338

339 **GSR is a target of dynamic zinc binding and zinc-induced cytotoxicity in select non-small cell lung cancers.**

340 GSR is a critical enzyme for maintaining the cellular redox homeostasis by keeping the glutathione (GSH) pool  
341 reduced. Glutathione metabolism has been widely studied as a therapeutic vulnerability in numerous cancers<sup>61,62</sup>,  
342 and our findings suggested a particular importance for GSR metabolism in lung cancer. GSR is a functional  
343 homodimer, with its active site constituted by both subunits (**Figure 7A, C**). The enzyme contains two active site  
344 cysteine residues that catalyze the reduction of oxidized glutathione (GSSG) into 2x GSH<sup>63,64</sup>. ZnCPT quantified  
345 six cysteines, including the two active site cysteines (Cys102 and Cys107), in GSR, among which the active site  
346 and the dimer interface were targets for inducible zinc binding (**Figure 7B, C**). We investigated the functional  
347 consequences of zinc binding to GSR and found that zinc can act as potent inhibitor of human recombinant GSR  
348 with an IC<sub>50</sub> of below 1 μM (**Figure 7D**). Furthermore, we observed a slight increase in GSR activity upon  
349 titration of TPEN, suggesting a low-level inhibition of enzyme activity by zinc at baseline (**Figure 7D**). To  
350 designate the target site of inhibitory zinc binding, we generated recombinant C134S mutant of human GSR and  
351 found that there was no perturbation of zinc-mediated enzyme inhibition (**Figure 7E**), indicating the active site of  
352 GSR was the key functional target of zinc. These results were corroborated by isothermal calorimetry (ITC)  
353 measurements which established a K<sub>d</sub> of 5.2 +/- 2.6 μM for the wild-type enzyme (**Figure 7F**). In contrast,  
354 replacing the active site histidine for a lysine (H511K, catalytic dead mutant) and thereby disrupting the putative  
355 zinc binding site in the catalytic domain of the enzyme, reduced the binding affinity for zinc by two orders of

356 magnitude (**Figure 7F**). This data supports zinc-mediated inhibition of GSR by binding to its active site. To  
357 examine how  $Zn^{2+}$  could be incorporated, we applied the mixed quantum mechanics and molecular mechanics  
358 (QM/MM) calculations to optimize a structural model with  $Zn^{2+}$  present at the active site. The energy minimized  
359 model suggested that tetrahedral coordination provided by Cys102, Cys107, Thr383, and His511 from the partner  
360 chain could be stable, consistent with the mutation data (**Figure 7G**).

361  
362 Next, we aimed at leveraging zinc-mediated GSR inhibition to target GSR in lung cancer cells. For this we first  
363 determined the effect of zinc on the glutathione redox state in the GSR-dependent SKMES1 and GSR<sup>High</sup> A549  
364 lung cancer cell lines (**Figure S5C, D**), using the well-established GSH recycling assay<sup>65-67</sup>. We confirmed a  
365 significantly lower GSH pool size in A549 compared to SKMES1 cells, in line with publicly available  
366 metabolomics data<sup>60</sup> (**Figure S5D, S6A**). Upon 5-hour treatment with zinc pyrithione (a membrane permeable zinc  
367 complex), we observed a concentration-dependent depletion of free intracellular GSH compared to untreated  
368 samples, which correlated with an increase in GSSG levels in both SKMES1 and A549 cells (**Figure 7H**). As zinc  
369 effectively depleted free GSH in both cell lines, we hypothesized that zinc might induce substantial oxidative  
370 stress and thereby drive cytotoxicity GSR-reliant cancer cells. To examine this, we determined cell viability upon  
371 treatment with zinc pyrithione or pyrithione +  $ZnCl_2$  for 24 hours and found that both cell lines exhibited  
372 considerable sensitivity to zinc with LD<sub>50</sub> at 10-20  $\mu$ M, which coincided with almost complete depletion of total  
373 GSH (**Figure 7I, S6B**). Because pyrithione alone appeared slightly inhibitory to cell proliferation at elevated  
374 concentrations (**Figure S6C**), and due to the limited cellular penetrance of zinc salicylate and  $ZnCl_2$  (**Figure S6D,**  
375 **E**), a combination of low pyrithione +  $ZnCl_2$ , was selected as standard treatment from here on. To examine a  
376 direct mechanistic link between zinc-mediated cytotoxicity and GSR inhibition, rescued zinc-mediated GSH  
377 depletion by replenishing cellular thiols using either N-acetyl cysteines (NAC; 10 mM) or cell permeable  
378 glutathione ethyl ester (GSHee; 1 mM), which both markedly alleviated zinc-induced toxicity (**Figure 7J, S6F**).  
379 Moreover, a desensitization of A549 cells towards zinc was observed upon overexpression of GSR (**Figure 7K,**  
380 **S6G, H**). In conclusion, leveraging ZnCPT together with pharmacological and genetic strategies we identify a  
381 novel mechanism of zinc-based inhibition of GSR that drives cytotoxicity in GSR-reliant lung cancer cells.

## 382 383 **Discussion**

384 ZnCPT represents a comprehensive atlas of the zinc binding proteome, which defines thousands of constitutive  
385 and inducible zinc binding cysteines across a range of protein functional domains. Importantly, ZnCPT reports  
386 deep proteome coverage with high specificity and accuracy, enabling precise residue-level assignment of zinc  
387 binding to proteins. This compendium constitutes an extensive resource, which can guide future research into the  
388 understudied regulatory role of zinc over proteins and cellular physiology.

389  
390 By capturing a substantial proportion of the proteome, ZnCPT defines general physicochemical and structural  
391 principles that govern zinc coordination. The systematic structural analysis of zinc binding site environments  
392 identified distinct features of zinc coordination sites between inducible and constitutive sites, providing  
393 mechanistic insights that can be further explored for individual protein and protein classes. These features also  
394 differentiate zinc binding from redox regulated cysteines, thereby enabling the classification of functionally  
395 distinct cysteine populations across the proteome.

396  
397 The comprehensive mapping of the zinc-regulated proteome enables systematic investigation of zinc-regulated  
398 cellular processes. Founded on these analyses, ZnCPT unveils a link between zinc and cancer, identifying  
399 numerous cancer dependencies as targets of zinc regulation. Based on this, we elucidated the mechanistic basis for  
400 potent zinc-mediated inhibition of GSR by binding to its active site. This forms the basis for marked zinc-induced  
401 cytotoxicity in GSR-reliant lung cancer cells. In conclusion, further research into a potential therapeutic role for  
402 zinc to enhance chemotherapeutics-induced cytotoxicity by sensitizing cancer cells to redox stress will be of  
403 interest.

404



405 Taken together, the ZnCPT this compendium provides the basis for the mechanistic characterization of targets  
406 underlying zinc regulation and can be used as a foundation for future work elucidating the critical role of zinc  
407 over cellular functions in health and disease.

408  
409

## 410 **Figure Legends**

411

### 412 **Figure 1: The ZnCPT dataset defines a quantitative map of the zinc binding proteome**

413 A Diverse functions are mediated by protein zinc binding

414 B Chemoproteomic workflow to determine zinc coordination by protein cysteines

415 C Comparison of cysteine coverage of ZnCPT and a previous study<sup>8</sup> to the theoretically quantifiable cysteine  
416 proteome<sup>68</sup>

417 D Illustration of the three different treatment strategies to determine the constitutive zinc binding, metal binding  
418 and inducible zinc binding proteome

419 E Cysteine accessibility changes upon TPEN (1 mM) treatment compared to control

420 F Cysteine accessibility changes upon EDTA (1 mM) treatment compared to control

421 G Cysteine accessibility changes upon EDTA (5 mM) treatment compared to control

422 H Cysteine accessibility changes upon ZnCl<sub>2</sub> (10 μM) treatment compared to control

423

### 424 **Figure 2: Characterization of zinc and metal binding cysteines**

425 A Comparison of cysteine accessibility changes between EDTA (1 & 5 mM) and TPEN treatment (relative to  
426 control) to define metal binding subpopulations

427 B Comparison of cysteine accessibility changes between ZnCl<sub>2</sub> and TPEN treatment (relative to control) to define  
428 dynamic zinc binding cysteine populations

429 C Subcellular distribution and enrichment of all and significantly changed cysteine containing proteins, upon  
430 treatment with TPEN, EDTA (1 & 5 mM) or ZnCl<sub>2</sub>

431 D Distribution of quantified cysteine residues per protein that are significantly changed upon treatment with  
432 TPEN, EDTA (1 & 5 mM) or ZnCl<sub>2</sub>

433 E Comparison of cysteine coverage and cysteine accessibility changes upon TPEN treatment with zinc binding  
434 cysteines identified in the ZincBind<sup>6</sup> dataset. Comparison of coverage of proteins containing cysteines that exhibit  
435 accessibility changes upon TPEN treatment to proteins containing zinc binding cysteines identified in the  
436 ZincBind dataset.

437 F Comparison of cysteine coverage and cysteine accessibility changes upon ZnCl<sub>2</sub> treatment with zinc binding  
438 cysteines identified in the ZincBind<sup>6</sup> dataset. Comparison of coverage of proteins containing cysteines that exhibit  
439 accessibility changes upon ZnCl<sub>2</sub> treatment to proteins containing zinc binding cysteines identified in the  
440 ZincBind dataset.

441

### 442 **Figure 3: ZnCPT replicates established examples of constitutive and inducible zinc/metal binding**

443 A Accessibility changes of quantified zinc-finger constituting cysteines (Cys80, 83, 259, 262, 288, 291) in ZPR1  
444 upon TPEN/ZnCl<sub>2</sub> treatment

445 B Accessibility changes of quantified zinc-finger constituting cysteines (Cys87, 112, 115) in the NDUF56 subunit  
446 of mitochondrial complex I upon TPEN/ZnCl<sub>2</sub> treatment

447 C Accessibility changes of quantified cysteines (Cys112, 120) in RAN, which are occluded by Mg<sup>2+</sup> and GDP,  
448 upon TPEN/EDTA/ZnCl<sub>2</sub> treatment

449 D Structure of MTF1 predicted by AlphaFold<sup>69</sup>, prior to and post addition of zinc using AlphaFill<sup>33</sup>. Accessibility  
450 changes of quantified zinc finger constituting cysteines in MTF1 upon ZnCl<sub>2</sub> treatment

451 E Quantification of cysteine peptides upon TPEN/ZnCl<sub>2</sub> treatment compared to control, demonstrates dynamic  
452 zinc binding by select cysteines in ISCU and MTF1

453

### 454 **Figure 4: Primary sequence and structural features determine constitutive and inducible zinc binding**

455 A Pfam domain enrichment for constitutive zinc binding cysteines

456 B Primary sequence motifs of constitutive zinc binding cysteine sites  
457 C Primary sequence motifs of inducible zinc binding cysteine sites  
458 D Distance matrix determining amino acid abundance and distance from inducible or constitutive zinc binding  
459 cysteines in protein structures obtained from AlphaFold<sup>69</sup>. Structures of zinc binding sites were clustered based on  
460 proximity of surrounding amino acid residues and are additionally illustrated as UMAP plots.

461

462 **Figure 5: Zinc regulates diverse functional protein classes including iron binding proteins**

463 A Comparison of cysteine oxidation (Oximouse dataset<sup>10</sup>) with accessibility changes upon TPEN/ZnCl<sub>2</sub> treatment

464 B GO Term (Function) enrichment for constitutive zinc binding cysteines

465 C GO Term (Function) enrichment for inducible zinc binding cysteines identifies iron binding proteins as  
466 enriched

467 D The HIF1 $\alpha$  prolyl hydroxylase EGLN1 (PHD2) is dynamically regulated by zinc (TPEN/ZnCl<sub>2</sub>). Zinc inhibits  
468 its hydroxylation activity

469 E The Iron-Sulfur (FeS) cluster assembly complex can coordinate zinc by ISCU Asp71, Cys95, His137 and NFS1  
470 Cys381. Upon association with Frataxin (FXN), the zinc coordination rearranges and is constituted by ISCU  
471 Asp71, Cys95 and Cys138. Cysteine accessibility changes upon TPEN/ZnCl<sub>2</sub> treatment of quantified cysteines in  
472 ISCU and NFS1 are shown.

473

474 **Figure 6: Pathway analysis establishes link between zinc binding and cancer**

475 A KEGG Pathway enrichment for inducible zinc binding cysteines (ZnCl<sub>2</sub>) identifies cancer related pathways as  
476 zinc-regulated.

477 B Mapping the Chronos CRISPR dependency score (DepMap Consortium) against the minimum Z-score defines  
478 populations of essential genes and selective cell line specific dependencies amongst inducible (ZnCl<sub>2</sub>) zinc  
479 binding proteins. Targets with average Chronos CRISPR dependency > -0.25 and minimum Z-score < -5 are  
480 selected and the minimum Z-score is mapped against the minimum Chronos CRISPR dependency score to  
481 identify strong selective dependencies (minimum Chronos CRISPR dependency < -1). Glutathione Reductase  
482 (GSR) has the second highest selective dependency and is identified as target of inducible zinc binding.

483 C ZnCPT identifies numerous selective cancer dependencies defined in DepMap as targets of dynamic zinc  
484 regulation, covering diverse functional protein domains

485

486 **Figure 7: ZnCPT identifies glutathione reductase (GSR) as cancer vulnerability targetable by zinc**

487 A Glutathione Reductase (GSR) is a critical regulator of the cellular redox state and functional dimer utilizing  
488 NADPH as redox equivalent to reduce GSSG into GSH.

489 B Accessibility changes of quantified cysteines in GSR upon TPEN/ZnCl<sub>2</sub> treatment

490 C Possible coordination sites for zinc in GSR are the active site, formed by Cys102, 107 and His511, and a site at  
491 the dimer interface formed by His126 and Cys134 of both protein chains. PDB:3DK4.

492 D GSR activity for wild-type human recombinant GSR upon titration with TPEN and ZnCl<sub>2</sub>

493 E GSR activity for wild-type and C134S mutant human recombinant GSR upon titration with ZnCl<sub>2</sub>

494 F Isothermal titration calorimetry (ITC) analysis for wild-type and H511K mutant human recombinant GSR

495 G Energy minimized model of zinc binding to the active site of GSR, coordinated by Cys102, Cys107, Thr383,  
496 and His511. Based on PDB:2AAQ.

497 H Treatment of SKMES1 and A549 lung cancer cells with zinc pyrithione shows a concentration dependent  
498 oxidation of the cellular glutathione pool after 5 hours of treatment

499 I Treatment of SKMES1 and A549 lung cancer cells with zinc pyrithione or 2  $\mu$ M pyrithione combined with  
500 ZnCl<sub>2</sub> shows concentration dependent cytotoxicity during treatment for 24 hours.

501 J Treatment of SKMES1 and A549 lung cancer cells with 2  $\mu$ M pyrithione combined with ZnCl<sub>2</sub> in presence of  
502 10 mM N-acetyl cysteine (NAC) or 1 mM Glutathione ethyl ester (GSHee) limits zinc-mediated cytotoxicity

503 K Overexpression of GSR in A549 lung cancer cells reduces zinc-mediated cytotoxicity upon treatment with 2  
504  $\mu$ M pyrithione combined with ZnCl<sub>2</sub>

505

506 **Supplementary Figure 1: Experimental strategy and characterization of the ZnCPT dataset**

507 A Experimental workflow for proteomic sample preparation to determine zinc coordination by protein cysteines  
508 B Quantification of cysteine containing peptides across different treatments in three plexes. Pairwise comparison  
509 demonstrates high reproducibility.

510

511 **Supplementary Figure 2: Characterization and benchmarking of the ZnCPT dataset**

512 A Hierarchical clustering of cysteine site accessibility, normalized to the average of respective controls across all  
513 replicate samples, shows a distinct clustering of treatment conditions.

514 B UMAP analysis across all replicates demonstrates a distinct clustering of treatment conditions, with all chelator  
515 treatments clustering together.

516 C Correlative map of different treatment conditions, specifying Pearson coefficients.

517 D Overlap of quantified cysteine sites across treatment conditions/plexes

518 E Correlations of cysteine accessibility changes upon ZnCl<sub>2</sub> treatment across three independent experiments

519 F Classification of inducible zinc binding cysteines according to their accessibility changes upon TPEN treatment

520 G Cysteine accessibility changes upon ZnCl<sub>2</sub> cross referenced to their accessibility upon TPEN treatment reveals  
521 that many inducible zinc binding cysteines do not bind zinc under baseline conditions

522 H Distribution of quantified cysteines per protein and cysteine coverage across treatment conditions

523

524 **Supplementary Figure 3: Primary sequence and structural features determine constitutive and inducible  
525 zinc binding**

526 A Primary sequence motifs of constitutive zinc binding cysteine sites. Related to Figure 4B.

527 B Primary sequence motifs of inducible zinc binding cysteine sites. Related to Figure 4C.

528 C Example structural folds of constitutive zinc binding sites, representative for individual structural clusters, as  
529 identified by distance analysis of the environment of constitutive zinc binding cysteines.

530 D Example structural folds of inducible zinc binding sites, representative for individual structural clusters, as  
531 identified by distance analysis of the environment of inducible zinc binding cysteines.

532

533 **Supplementary Figure 4: Constitutive zinc binding regulates different cellular pathways**

534 A KEGG Pathway enrichment for constitutive zinc binding cysteines (TPEN) identifies diverse pathways as zinc-  
535 regulated.

536 B KEGG Pathway enrichment for constitutive zinc binding cysteines (TPEN) identifies RNA Polymerase as  
537 target of zinc binding

538 C KEGG Pathway enrichment for constitutive zinc binding cysteines (TPEN) identifies Ubiquitin E3 enzymes  
539 and SUMO E1 and E3 enzymes as targets of zinc binding

540 D KEGG Pathway enrichment for constitutive zinc binding cysteines (TPEN) identifies several cancer-related  
541 pathways as targets of zinc binding

542

543 **Supplementary Figure 5: Zinc is a regulator of cancer dependency proteins with GSR being a lung specific  
544 zinc target**

545 A Rank ordered average Chronos CRISPR dependency score and minimum Z-score for 17928 genes calculated  
546 across 1095 cancer cell lines (DepMap consortium). The distribution of constitutive (TPEN) or inducible (ZnCl<sub>2</sub>)  
547 zinc binding proteins identifies and enrichment of constitutive zinc binding proteins corresponding to essential  
548 genes.

549 B Mapping the Chronos CRISPR dependency score against the minimum Z-score defines populations of essential  
550 genes and selective cell line specific dependencies amongst constitutive (TPEN) zinc binding proteins. Targets  
551 with average Chronos CRISPR dependency > -0.25 and minimum Z-score < -5 are selected and the minimum z  
552 score is mapped against the minimum Chronos CRISPR dependency score to identify strong selective  
553 dependencies (minimum Chronos CRISPR dependency < -1).

554 C Comparison of Chronos CRISPR dependency Z-score for GSR between SKMES1 and A549 lung cancer cells  
555 (DepMap consortium)

556 D Correlation of GSR expression and protein abundance across 685 cancer cell lines, including SKMES1 and  
557 A549 cells (DepMap consortium; Gonçalves et al. Cancer Cell 2022<sup>59</sup>). Select lung cancer cell lines express high

558 levels of glutathione reductase. These cell lines also show elevated levels of glutathione synthesis genes (GCLC  
559 and GCLM), as well as genes of the pentose phosphate pathway which supply NADPH to GSR. GSR<sup>High</sup> lung  
560 cancer cell lines also have elevated levels of GSH, GSSG and NADP (Li et al. Nature Medicine 2019<sup>60</sup>).

561

### 562 **Supplementary Figure 6: ZnCPT identifies glutathione reductase (GSR) as cancer vulnerability targetable** 563 **by zinc**

564 A Comparison of the GSH pool size between SKMES1 and A549 cancer cells

565 B The free GSH pool of SKMES1 and A549 lung cancer cells is severely depleted, whereas the proportion of  
566 GSSG is substantially increased upon treatment with 10  $\mu$ M zinc pyrithione for 24 hours.

567 C Pyrithione inhibits cell proliferation at a concentration range at which zinc pyrithione exhibits cytotoxicity on  
568 SKMES1 and A549 cells during 24 hours of treatment. Indicated concentrations correspond to respective  
569 concentrations of zinc pyrithione, 2x equivalents of pyrithione were titrated, matching respective zinc pyrithione  
570 concentrations.

571 D Treatment of A549 lung cancer cells with zinc salicylate does not impact cell viability during treatment for 24  
572 hours.

573 E Treatment of SKMES1 and A549 lung cancer cells with high concentrations of ZnCl<sub>2</sub> exhibits cytotoxicity  
574 following more than 12 hours of treatment.

575 F Treatment of SKMES1 and A549 lung cancer cells with zinc pyrithione in presence of 10 mM N-acetyl cysteine  
576 (NAC) or 1 mM Glutathione ethyl ester (GSHee) limits zinc-mediated cytotoxicity. Cell viability upon treatment  
577 with 2x equivalents of pyrithione is shown for reference.

578 G Selected GSR overexpressing single cell clones show elevated GSR protein levels.

579 H Overexpression of GSR in A549 lung cancer cells reduces zinc-mediated cytotoxicity upon treatment with zinc  
580 pyrithione. Cell viability upon treatment with 2x equivalents of pyrithione is shown for reference.

581

582

### 583 **Methods**

584

### 585 **Resource Availability**

586

### 587 **Lead contact**

588 Further information and requests for resources should be directed to and will be fulfilled by the Lead Contact,  
589 Edward T. Chouchani (edwardt\_chouchani@dfci.harvard.edu).

590

### 591 **Materials availability**

592 This study did not generate any new reagents.

593

### 594 **Experimental Model and Subject Details**

595

### 596 **Maintenance of cell lines**

597 HCT116 and Lenti-X<sup>TM</sup> 293T cells were cultured in DMEM (Corning, 10-017-CV) without pyruvate,  
598 supplemented with 10% FBS (GeminiBio, 100-106) and 1% P/S (Corning, 30-002-CI). SKMES1 and A549 cells  
599 were cultured in EMEM (ATCC, 30-2003), supplemented with 10% FBS (GeminiBio, 100-106) and 1% P/S  
600 (Corning, 30-002-CI). All cells were washed with PBS (Corning, 21-040-CV) detached using 0.25% trypsin  
601 (Gibco, 25200-056) and subcultured every other day.

602

### 603 **Method Details**

604

### 605 **CPT synthesis**

606 CPT was synthesized as described previously<sup>10</sup>. Briefly, 6-aminohexylphosphonic acid hydrochloride salt (6-  
607 AHP; SiKEMIA) was added to succinimidyl iodoacetate (SIA; Combi-Blocks) to final concentrations of 45 mM  
608 SIA and 175 mM 6-AHP and reacted at room temperature for 1 hour while slowly stirring in the dark. The

609 reaction was quenched with TFA (final pH < 2) and purified via HPLC (C18 column, solvent A: water with  
610 0.035% TFA, solvent B: acetonitrile (ACN) with 0.035% TFA, 100%–40% solvent A over a 60-min gradient at a  
611 flow rate of 40 mL/min). The eluent containing CPT was frozen and lyophilized yielding a white powder. Quality  
612 was controlled via LC-MS as described previously<sup>10</sup>.

613

#### 614 **Preparation of native cell lysates**

615 HCT116 cells were cultured in standard medium (Dulbecco's Modified Eagles Medium (DMEM) w/o sodium  
616 pyruvate) in 15 cm dishes to 80-90% confluency (5 dishes per experiment). Cells were washed with 10 ml ice  
617 cold PBS and then gently scraped into 5 ml of PBS. Cells were centrifuged for 5 min at 1000 x g followed by two  
618 washes with 50 mM HEPES, 150 mM NaCl (pH 7.5). The final cell pellet was resuspended in 0.8 ml of native  
619 lysis buffer (50 mM HEPES, 150 mM NaCl, 0.5 % (v/v) IGEPAL (pH 7.5), and 0.5 mM TCEP). Cells were  
620 incubated rotating for 10 min at 4°C and subsequently disrupted by passing 10x through a G28 injection needle.  
621 Cell lysates were clarified by centrifugation for 15 min (21,000 x g and 4 °C) and protein content in the  
622 supernatant was determined using a Pierce™ BCA assay kit (Thermo Scientific, USA). Cell lysates were diluted  
623 to a final concentration of 2 mg protein/ ml in native lysis buffer and kept on ice until used freshly.

624

#### 625 **ZnCl<sub>2</sub>/chelator treatments and CPT labelling**

626 Native cell lysates (200 µl corresponding to 400 µg protein) was distributed into individual Eppendorff tubes on  
627 ice. Zinc/Metal binding in native lysates was manipulated by addition of 100x stocks of ZnCl<sub>2</sub> (10 µM final),  
628 TPEN (1mM final), EDTA (1 and 5 mM final), control samples received equivalent volume of buffer. Samples  
629 were incubated for 15 min at 37°C shaking at 500 rpm, prior to addition of 20 mM CPT (200 mM stock in 25 mM  
630 HEPES (pH 7.5), 150 mM NaCl, pH-ed with 1 M NaOH to pH 7.5. Accessible cysteines were labeled with CPT  
631 for 1 hour at room temperature in the dark. The labelling was rapidly quenched by precipitation of proteins on ice,  
632 using 3x vol. of methanol, 1 vol. of chloroform and 2.5 vol. of H<sub>2</sub>O, followed by vortexing and centrifugation for  
633 15 min (15,000 x g and 4 °C). The resulting protein precipitate was washed three times with 1 ml methanol  
634 followed by centrifugation for each 5 min (15,000 x g and 4 °C).

635

#### 636 **Protein digestion and TMT labelling**

637 Precipitated protein pellets (~400 µg protein) were dried and resuspended in 100 µl 200 mM N-(2-  
638 Hydroxyethyl)piperazine-N'-(3-propanesulfonic acid) (EPPS) (pH 8.0), containing trypsin (Promega; final 1/100  
639 enzyme/protein ratio) and LysC (Wako, Japan; final 1/100 enzyme/protein ratio). Protein lysates were digested  
640 overnight shaking vigorously (1500 rpm at 37 °C). Samples were centrifuged for 10 min at 21,000 x g, soluble  
641 peptide suspension was transferred into fresh Eppendorf tubes and peptide concentration was determined by  
642 microBCA (Thermo Scientific). Equal amounts of peptides for each sample (150-200 µg) were transferred into  
643 fresh tubes and samples were completed to a volume of 100 µl with 200 mM EPPS (pH 8.0). Peptides were  
644 labelled with 40 µl of TMTpro (16- or 18-plex) reagents in acetonitrile for 1 hr in the dark at RT, while vortexed  
645 intermittently. Following the labelling 2 µl of each sample were combined into 120 µl of 1% formic acid in H<sub>2</sub>O,  
646 desalted and analysed as ratio check via LC-MS. TMT labelled samples were stored transiently at -80 °C. Upon  
647 completion of the ratio check analysis, the labelling reaction was quenched by addition of 5 µl hydroxylamine  
648 (5% stock) and incubation for 15 min at RT. Samples were pooled at equal amounts according to the ratio check  
649 and diluted with 12 ml of 1% formic acid in H<sub>2</sub>O and subjected to gravity flow driven C18 solid-phase extraction  
650 (200 mg Sep-Pak, Waters) and subsequently vacuum dried.

651

#### 652 **Cysteine peptide enrichment**

653 TMT labelled pooled peptides were resuspended in phosphatase buffer (50 mM HEPES, 100 mM NaCl, 1 mM  
654 MnCl<sub>2</sub> (pH 7.5) and Lambda phosphatase (Santa Cruz Biotechnologies) was added according to manufacturer's  
655 instructions. Peptides were dephosphorylated during 2 hrs at 30 °C shaking at 500 rpm. Subsequently, the sample  
656 was acidified with 10% TFA to a pH of < 3.0 (~60 µl), subjected to gravity flow driven C18 solid-phase  
657 extraction (200 mg Sep-Pak, Waters) and vacuum dried. CPT labelled cysteine peptides were purified using the  
658 High-select Fe-NTA phosphopeptide enrichment kit (Thermo Scientific) according to manufacturer's instructions.  
659 Following elution of enriched CPT-labelled cysteine peptides, the peptide suspension is acidified with 10% TFA

660 to a pH of < 3.0 (~25 µl), subjected to gravity flow driven C18 solid-phase extraction (50 mg Sep-Pak, Waters)  
661 and vacuum dried.

662

### 663 **Cysteine peptide fractionation by HPLC**

664 Dried peptides (~100 µg) were resuspended in 300 µl of high-performance liquid chromatography (HPLC) buffer  
665 A containing 5 mM ammonium bicarbonate pH 8.0, 5% acetonitrile and centrifuged through a PTFE 0.2 µm filter  
666 (Merck). Peptides were fractionated with basic pH reversed-phase HPLC using an Agilent 300 extend C18  
667 column. A 50-min linear gradient in 13 - 43% buffer B (5 mM ammonium bicarbonate, 90% acetonitrile, pH 8.0)  
668 at a flow rate of 0.25 ml/min, and eluates were collected into a 96-deep-well plate. Fractions were consolidated  
669 into 12 tubes and vacuum dried followed by peptide desalting (stage tip) and LC-MS/MS analysis.

670

### 671 **Peptide desalting (stage tip) for LC-MS/MS**

672 Peptides were desalted prior to LC-MS analysis using solid phase extraction (stage tip). Briefly, C18 Octadecyl  
673 HD solid phase extraction disk (CDS Analytics, USA) was used to prepare stage tips in house. The matrix was  
674 activated with 100% ACN, followed by washes with 70% ACN, 1% FA and H<sub>2</sub>O, 1 % FA. Dried peptides were  
675 dissolved in H<sub>2</sub>O, 1 % FA and passed through the C18 matrix. Peptides were washed twice with H<sub>2</sub>O, 1 % FA and  
676 subsequently eluted into MS vials in two steps with 40% ACN, 1% FA and 70% ACN, 1% FA. Peptides were  
677 vacuum dried and stored at -80°C until analysis.

678

### 679 **LC-MS/MS parameters**

680 An Orbitrap Eclipse Tribrid Mass Spectrometer (Thermo) coupled with an Easy-nLC 1200 (Thermo) was used for  
681 proteomics measurements. Of each fraction ~ 3 µg of peptides, dissolved in 5% ACN, 5% FA were loaded onto  
682 an in-house 100-µm capillary column packed with 35 cm of Accucore 150 resin (2.6 µm, 150 Å). Peptides were  
683 separated and analyzed using a 180-min gradient consisting of 2% - 23% ACN, 0.125% FA at 500 nl/min flow  
684 rate. A FAIMSPro (Thermo) device was used for field asymmetric waveform ion mobility spectrometry (FAIMS)  
685 separation of precursors<sup>70</sup>, and the device was operated with default settings and multiple compensation voltages  
686 (-40V/-60V/-80V). Under each voltage, data-dependent acquisition mode was used for a mass range of m/z 400-  
687 1400 applying a top10 DDA method. Resolution for MS1 was set at 120,000. Singly-charged ions were not  
688 further sequenced, and multiply-charged ions were selected and subjected to fragmentation with standard  
689 automatic gain control (AGC) and 35% normalized collisional energy (NCE) for MS2, with a dynamic exclusion  
690 window of 30 s. Quantification of TMT reporter ions were performed using the multinotch SPS-MS3 method  
691 with 45% NCE for MS3, which is optimized for TMTpro-16/-18 reagents.

692

### 693 **Database searching**

694 Raw files were first converted to mzXML, and searched using the Comet algorithm<sup>72</sup> on an in-house database  
695 search engine reported previously<sup>73</sup>. Database searching included all human (Homo Sapiens) entries from UniProt  
696 (<http://www.uniprot.org>, downloaded 2021) and the reversed sequences as well as common contaminants  
697 (keratins, trypsin, etc.). Peptides were searched using the following parameters: 25 ppm precursor mass tolerance;  
698 1.0 Da product ion mass tolerance; fully tryptic digestion; up to three missed cleavages; variable modification:  
699 oxidation of methionine (+15.9949); static modifications: TMTpro (+304.2071) on lysine and peptide N terminus.  
700 The false discovery rate (FDR) was controlled as described previously<sup>73-75</sup> to < 1% on peptide level for each MS  
701 run using parameters such as XCorr, ΔCn, missed cleavages, peptide length, charge state and precursor mass  
702 accuracy. Then protein-level FDR was also controlled to < 1%. Cysteine site localization was determined using  
703 the ModScore algorithm<sup>76</sup> where a score of 19 corresponds to 99% confidence in correct localization.

704

### 705 **TMT reporter-based quantification**

706 TMT reporter ions were used for quantification of peptide abundance. Each reporter ion was scanned using a  
707 0.003 Da window, and the most intense m/z was used. Isotopic impurities were corrected according to the  
708 manufacturer's specifications, and signal-to-noise ratio (S/N) was calculated. Peptides with summed S/N lower  
709 than 160 across 16 channels of each TMTpro16 plex (180 across 18 channels of each TMTpro18 plex) or  
710 isolation specificity lower than 0.5 were discarded.

711

## 712 **Data analysis**

713 All data analyses were performed in R (Version 4.2.1) unless stated otherwise. Spearman correlations were either  
714 performed in GraphPad Prism 10 or in R. Significance of cysteine exposure was determined with two-tailed  
715 Student's t tests for pairwise comparison, and multiple comparisons were corrected using the Benjamini-  
716 Hochberg procedure<sup>77</sup>. Sites with accessibility changes  $>1.5$  (constitutive zinc/metal binding: TPEN/EDTA) or  
717  $<0.8$  (inducible zinc binding:  $ZnCl_2$ ) and  $p_{adj} < 0.05$  were defined as significantly changed sites. The heatmap  
718 highlighting accessibility changes was generated for cysteine sites quantified across the entire dataset (no missing  
719 values). For the clustering the pheatmap package (Version 1.0.12) using the default complete linkage clustering  
720 method. Uniform Manifold Approximation and Projection (UMAP) analysis for dimension reduction was  
721 performed for cysteine sites quantified across the entire dataset (no missing values) using the UMAP package<sup>78</sup>.  
722 Protein subcellular localization data was downloaded from Human Proteome Atlas (<https://www.proteinatlas.org>)  
723 based on data previously reported<sup>20</sup> and matched to the ZnCPT dataset. Nucleoplasm, nuclear speckles, nuclear  
724 bodies, nuclear membrane, nucleus, nucleoli fibrillar center, and nucleoli rim were consolidated into the nucleus  
725 annotation. Actin filaments, centrosome, cytosol, cytoplasmic bodies, cytokinetic bridge, centriolar satellite,  
726 intermediate filaments, midbody, microtubules, microtubule ends, midbody ring, mitotic chromosome,  
727 microtubules ends, mitotic spindle, and rods & rings were consolidated into the cytoplasm annotation. Golgi  
728 apparatus and Golgi were consolidated into the Golgi annotation. Endosomes and lysosomes were consolidated  
729 into the EndoLysosomes annotation. Cell junctions, focal adhesion sites, and plasma membrane were consolidated  
730 into the plasma membrane annotation. Distribution of proteins containing significantly or non-significantly  
731 changing cysteines across subcellular compartments was assessed, and enrichment of proteins for the individual  
732 compartments was calculated using Fisher's exact tests. For Pfam protein domain analysis, the Pfam dataset for  
733 the human proteome (Taxonomy ID: 9606) was retrieved from the InterPro website  
734 (<https://www.ebi.ac.uk/interpro>). Pfam domains were matched to the ZnCPT dataset based on Uniprot ID and the  
735 position of quantified cysteines and the start/end of the domain within the protein sequence. Pfam domains  
736 matching at least three cysteines within ZnCPT were selected and Pfam enrichment for significantly changed  
737 cysteines was calculated using Fisher's exact tests. Multiple comparisons were corrected using the Benjamini-  
738 Hochberg procedure<sup>77</sup>. GO Process and GO Function term datasets for the human proteome (Taxonomy ID: 9606)  
739 were obtained from the QuickGo website (<https://www.ebi.ac.uk/QuickGO/annotations>). GO terms matching at  
740 least three proteins within ZnCPT were selected and GO term enrichment for proteins containing significantly  
741 changed cysteines was calculated using Fisher's exact tests. Multiple comparisons were corrected using the  
742 Benjamini-Hochberg procedure<sup>77</sup>. The ZincBind<sup>6</sup> dataset was kindly provided by Sam Ireland and Andrew  
743 Martin. All human Uniprot data was retrieved from Uniprot (<https://www.uniprot.org>). Uniprot Name, Uniprot ID  
744 and all associated PDB information was extracted. ZincBind was filtered for PDB IDs that were contained within  
745 the human Uniprot dataset and in which zinc was coordinated by a cysteine residue. The ZincBind and human  
746 Uniprot datasets were merged by PDB ID and chain ID of the metal binding residue defined in ZincBind. The  
747 generated final ZincBind dataset was matched to the ZnCPT dataset by Uniprot ID and position of quantified  
748 cysteines. The overlap of both datasets for cysteine sites and proteins, was calculated for the entire dataset and  
749 sites or proteins containing sites that exhibit significantly changed accessibility of any magnitude. Zinc binding  
750 motifs (+/- 6 amino acids around the quantified cysteine) were extracted and separated into significantly changing  
751 and background motifs. Comprehensive motif analysis was performed using the MEME suite ([https://meme-](https://meme-suite.org/meme/)  
752 [suite.org/meme/](https://meme-suite.org/meme/)) and the XSTREME<sup>34</sup> motif analysis algorithm. Sequence logos of significantly enriched motifs  
753 were retrieved. The oximouse dataset<sup>10</sup> was obtained from the oximouse website  
754 (<https://oximouse.hms.harvard.edu>). To match the oximouse dataset to ZnCPT, mouse and human entire proteome  
755 sequences were retrieved from Uniprot (<https://www.uniprot.org>). Human and mouse proteins were matched by  
756 their Uniprot names, all selenocysteines (U) were replaced with cysteines (C), and sequences were aligned using  
757 the Biostrings package. The site number of conserved cysteines was extracted and used to match cysteine  
758 oxidation values from the oximouse dataset to ZnCPT. Delta oxidation values for cysteines were calculated for  
759 young and aged mice across all organs to map the redox regulatory potential for each cysteine. For KEGG  
760 pathway enrichment analysis, the human KEGG pathway dataset mapped to KEGG gene identifiers was retrieved  
761 from the KEGG website (<https://rest.kegg.jp/>). The KEGG pathways were mapped to a dataset containing Uniprot

762 IDs and Uniprot names, by KEGG gene identifiers retrieved from Uniprot (<https://www.uniprot.org>). From this,  
763 KEGG pathway annotations were mapped to ZnCPT. KEGG pathways matching at least three proteins within  
764 ZnCPT were selected and KEGG pathway enrichment for proteins with significantly changed cysteines was  
765 calculated using Fisher's exact tests. Multiple comparisons were corrected using the Benjamini-Hochberg  
766 procedure<sup>77</sup>. The DepMap chronos cancer dependency dataset was retrieved from the DepMap portal  
767 (<https://depmap.org/portal>) Public 13Q2 release: CRISPR (DepMap Public 23Q2+Score, Chronos dataset). Z-  
768 scores were calculated for each gene across all cell lines within the datasets. The DepMap dataset was mapped to  
769 ZnCPT by gene name. The Gene Expression dataset was retrieved from the DepMap portal  
770 (<https://depmap.org/portal>) Public 13Q2 release: Expression Public 23Q2. The cancer cell line proteome dataset<sup>59</sup>  
771 was obtained from the Cell Model Passports website (<https://cellmodelpassports.sanger.ac.uk> ;  
772 release:2022.12.14). The cancer cell line metabolome dataset<sup>60</sup> was obtained from the DepMap portal  
773 (<https://depmap.org/portal>) Public 13Q2 release: Metabolomics dataset). Intensities for abundance of GSH,  
774 GSSG, and NADP were extracted for all cancer cell lines within the dataset. Protein structural data was retrieved  
775 from the RCSB protein databank (<https://www.rcsb.org>) or AlphaFold<sup>69,79</sup> (<https://alphafold.ebi.ac.uk>). The  
776 AlphaFold structure for MTF1 (AF-Q14872-F1) was processed with the AlphaFill<sup>33</sup> web application  
777 (<https://alphafill.eu>) to model zinc by similarity into the zinc finger domains predicted by AlphaFold. Structural  
778 analysis including figure generation was performed in PyMOL (Version 2.3.1).

779

### 780 **Analysis of the 3D structural coordination motif of zinc binding**

781 Structural motif analysis were performed in Python (Version 3.7). The AlphaFold structures for human proteins  
782 were downloaded from [alphafold.ebi.ac.uk](http://alphafold.ebi.ac.uk). Each structure was cleaned by pruning the low confidence regions  
783 (pLDDT < 70). Cysteine sites identified by ZnCPT were mapped to the AF structures, and residues within 5 Å of  
784 the sulfur atom of the cysteine were extracted as the microenvironment for the cysteine of interest. The  
785 environment matrix for each cysteine was calculated by binning the occurrence of each amino acid type between  
786 2 Å and 5 Å with a step of 0.5 Å. The proximity of each residue was measured by the shortest distance between  
787 the sulfur atom and the residue heavy atoms. A combined matrix for all constitutive and inducible sites was  
788 generated. To cluster the structure environment, the sequence of amino acid was constructed based on the  
789 environmental matrix. The sequence was ordered in proximity shells to the cysteine (i.e. sulfur atom). The first  
790 shell was between 2 – 3 Å, the second shell was between 3 – 4 Å, and the final shell is between 4 – 5 Å. A special  
791 character "X" was inserted between each shell to indicate shell structure. For example, the sequence  
792 "CCXFVXDW" indicated a disulfide bond in the first shell because of short distance between two CC, and two  
793 residues phenylalanine (F) and valine (V) in the second shell, and aspartate (D) and tryptophan (W) in the third  
794 shell. The order of amino acid within each shell followed a predefined order independent of primary sequence.  
795 The sequences was then aligned using biopython globalxx algorithm without gap penalty. The alignment scores  
796 were converted to distance in terms of percentage of match residues, and the distance matrix was used to cluster  
797 the sites. The clustering was done using scipy cluster package with "ward" algorithm. Uniform manifold  
798 approximation and projection (UMAP) plots were generated using python umap package to project the distance  
799 matrix onto 2D.

800

### 801 **Molecular modeling GSR zinc binding site**

802 GSR crystal structure 2AAQ was used as the template for generating the molecular model initial structure, where  
803 Au ion was replaced by Zn<sup>2+</sup>. The nearby residues (residue 467 of chain A, residue 339, 58, 63 of chain B) were  
804 chosen at quantum mechanical region. Other residues were treated classically. Energy optimization was carried  
805 out using B3LYP density functional model with LACVP++\*\* basis set by QM/MM module in the Schrödinger  
806 PyMOL software suite (Version 2.5).

807

### 808 ***In vitro* hydroxylation of HIF1 $\alpha$ -ODD peptide by human recombinant EGLN1**

809 To measure prolyl hydroxylation activity, recombinant human PHD2(EGLN1) was purchased from Active Motif  
810 (USA, #81065) and HIF1 $\alpha$ -ODD peptide (DLDLEALAPYIPADDDFQL) was purchased from GeneScript  
811 Biotech (USA). A mastermix reaction solution containing 5  $\mu$ g/ml recombinant EGLN1, 20  $\mu$ g/ml HIF1 $\alpha$ -ODD  
812 peptide, 5 mM KCl, 1.5 mM MgCl<sub>2</sub>, 100  $\mu$ M 2-Oxoglutarate, 100  $\mu$ M L-Ascorbate and 50  $\mu$ M Ammonium



813 iron(II) sulfate hexahydrate containing additionally indicated concentrations of ZnCl<sub>2</sub> was prepared. The reaction  
814 was started upon addition of 2-Oxoglutarate. At indicated time points 10 µl of the reaction solution were  
815 retrieved, quenched by addition of 5% ACN 5% FA and stored at -20°C until same-day analysis via LC-MS.  
816 Samples were separated on a PLRP-S 1000A, 2.1 × 50 mm, 5 µm column (Agilent). The mobile phases  
817 were MS solvent A (H<sub>2</sub>O, 2% FA) and B (ACN, 2% FA) at a flow rate of 0.3 ml/min with the following gradient  
818 (the proportion of MS solvent B is given in %): 0–1.5 min: 15%, 1.5–3 min: 15–95%, 3–3.5 min: 95%, 3.5–4 min:  
819 100–15%, 4–5 min: 15% at 60°C column temperature. For analysis a Q-Exactive HF-X mass spectrometer  
820 (Thermo Fisher Scientific) in positive ion mode was used with full scan analysis over a range of m/z 400–  
821 1600 m/z at 60,000 resolution, 1 × 10<sup>5</sup> AGC target and 50 ms maximum ion accumulation time. Top 5  
822 multiply charged peptide ions were selected for MS/MS each second and were analyzed using the following  
823 parameters: resolution 15,000; AGC target of 1 × 10<sup>5</sup>; maximum ion transfer of 100 ms; 0.7 m/z isolation  
824 window; for HCD a normalized collision energy 34% was used; and dynamic exclusion of 10 s. HIF1α-ODD  
825 peptides were quantified by determining the peak area of XICs (extracted ion chromatograms) of monoisotopic  
826 peaks (1067.5149 m/z HIF1α-ODD peptide, 1075.5124 m/z Hydroxy-HIF1α-ODD peptide; 10 ppm mass error)  
827 using the Thermo Xcalibur software (v4.1)

828

### 829 **Expression and purification of human recombinant GSR**

830 The N-terminal 6xHis-tagged construct of human GSR (wild-type and C134S mutant) (residues 44–522) was  
831 cloned into a pET-28a(+) expression vector was purchased from GeneScript Biotech (USA). The N-terminal  
832 TwinStrep-tagged construct of human GSR (wild-type and H511K mutant) (residues 44–522) was cloned into a  
833 pET-28a(+) expression vector was purchased from GeneScript Biotech (USA). Proteins were overexpressed in E.  
834 coli BL21(DE3)(Life Technologies, USA) and purified using affinity chromatography. Cells were grown at 37°C  
835 in TB medium (containing 50 µg/ml kanamycin) to an OD<sub>600</sub> of 1, cooled to 16°C and induced with 1 mM  
836 isopropyl-1-thio-D-galactopyranoside (IPTG) and grown over night. Alternatively, cells were grown in Overnight  
837 Express™ Auto-inducible medium (containing 50 µg/ml kanamycin) to an OD<sub>600</sub> of 1, cooled to 16°C and  
838 grown over night. Cells were harvested by centrifugation (6000 xg) and resuspended in ice-cold lysis buffer (100  
839 mM HEPES, 500 mM NaCl, 5 mM TCEP (and 20 mM Imidazole for 6xHis-tagged proteins), pH 8. Cells were  
840 lysed by sonication using a Q500 Sonicator (QSONICA Sonicators, USA) during 10x 30s on, 30s off cycles. The  
841 resulting lysate was centrifuged for 30 min (30,000 x g, 4°C) and the soluble fraction was collected. His-tagged:  
842 The lysate was mixed head-over-head with Ni-NTA agarose resin (Thermo Scientific™, USA) for 60 min at 4°C.  
843 Resin was transferred to chromatography columns and washed with 15 column volumes of 100 mM HEPES, 500  
844 mM NaCl, 5 mM TCEP, and 20 mM Imidazole, pH 8. Protein was eluted in 10 fractions with each 1.5 ml of 100  
845 mM HEPES, 100 mM NaCl, 5 mM TCEP, and 250 mM Imidazole, pH 8. TwinStrep-tagged: The lysate was  
846 passed through chromatography columns containing 1.5 ml bed volume of Strep-Tactin® Sepharose® resin (IBA  
847 Lifesciences, Germany). Resin was washed with ~20 resin volumes of 100 mM HEPES, 500 mM NaCl, 1 mM  
848 TCEP, pH 8 and eluted in 7 fractions of 0.5 ml of 100 mM HEPES, 150 mM NaCl, 2.5 mM Desthiobiotin, 1 mM  
849 TCEP, pH 7.5. All purified protein: Fractions containing glutathione reductase were combined and desalted using  
850 5 or 10 ml Zeba™ Spin desalting columns (Thermo Scientific™, USA) into 50 mM HEPES, 150 mM NaCl, 5  
851 mM TCEP, pH 7.4. TwinStrep-tagged proteins were concentrated using 30K MWCO concentrators to ~ 5 mg/ml  
852 (Thermo Scientific™, USA). Protein was stored at -80°C.

853

### 854 **Isothermal Titration Calorimetry**

855 For ITC, protein samples were filtered (0.2 µm centrifugal filter) and were then further purified by size-exclusion  
856 chromatography on Superdex 200 resin (GE Healthcare) using 25 mM HEPES, 150 mM NaCl, pH 7.5 as buffer.  
857 ZnCl<sub>2</sub> (Sigma) was dissolved in the same buffer. ITC experiments were carried out in an Affinity ITC instrument  
858 (TA Instruments) at 25°C. The titrations were performed by injecting 2.5 µl aliquots of 10x (concentration of  
859 protein) ZnCl<sub>2</sub> into the calorimeter cell containing a 185 µl solution of 40.38 µM wild-type or 29.74 µM H511K  
860 glutathione reductase with a constant stirring speed at 125 rpm, and the heats were recorded. The data were  
861 analyzed with the NanoAnalyze using the independent fit model. All the uncertainties were estimated by the  
862 native statistics module with 10000 synthetic trials and 95% confidence level.

863

## 864 **Cell Viability Assay**

865 Cell viability was assessed using the CellTiter-Glo® Luminescent Cell Viability Assay (Promega). Cells were  
866 seeded at a density of 7000 cells/ well (in 50 µl standard culture medium) into white 384-well flat bottom, low  
867 flange plates (Corning) and left to attach for at least 6 hours. The medium was exchanged for 25 µl standard  
868 medium containing indicated concentrations of chemicals (6-plicate per condition) for up to 24 hours. Cell  
869 viability was determined upon addition of 25 µl CellTiter-Glo® reagent in accordance with manufacturer's  
870 instructions and luminescence was measured using a ClarioSTAR Plus plate reader (BMG Labtech, Germany).

## 872 **Glutathione Reductase Activity Assay**

873 Glutathione Reductase activity (recombinant human Glutathione Reductase (Bio-Techne: #8866-GR-100) or  
874 homemade recombinant Glutathione Reductase) was determined by measuring the consumption of NADPH in the  
875 presence of GSSG. The assay was performed in a 96-well format with a total assay volume of 200 µl per well and  
876 three technical replicates of each condition. The NADPH absorbance was measured with a ClarioSTAR Plus  
877 microplate reader (BMG Labtech, Germany). All reagents were prepared in 100 mM Tris-HCl pH 7.5. Wells were  
878 pre-plated with 20 µl of 10x ZnCl<sub>2</sub> or TPEN dilutions, followed by addition of 30 µl 100 mM Tris-HCl pH 7.5.  
879 Then, 50 µl of recombinant Glutathione Reductase at a concentration of 1.2 µg/ml and 50 µl of 4 mM GSSG was  
880 added. The absorbance was measured for 50 cycles at room temperature monitoring the absorbance at  $\lambda = 340$  and  
881 380 nm in 45 second intervals. Following 5 cycles of baseline readings, 50 µl of 0.8 mM NADPH was rapidly  
882 added to each well and measurements were continued. The maximum linear rate of NADPH oxidation and the  
883  $\Delta$ Absorbance (340–380nm) was calculated. The NADPH concentration was determined using the extinction  
884 coefficient  $\epsilon_{340-380} = 4.81 \text{ mM}^{-1}\text{cm}^{-1}$ .

## 886 **Measurement of total GSH and GSSG in cells**

887 The total (GSH) and oxidized (GSSG) glutathione of cells was determined using the well-established glutathione  
888 recycling assay. Cells were seeded into 6-well plates at  $5 \times 10^5$  cell/well the day before the assay ( $2.5 \times 10^5$  cell/well  
889 two days before the assay (24-hour treatment)). Cells were treated for 5 or 24 hours with indicated concentrations  
890 of zinc pyrithione, pyrithione + ZnCl<sub>2</sub>. Following the treatment, cells were rapidly collected and lysed in 170 µl  
891 ice-cold 5 % 5-sulfosiacylic acid (SSA) and stored on ice. The 6-well plates were processed on a plate-by-plate  
892 basis to ensure rapid quenching of the glutathione redox state. Upon completion of cell lysis, extracts were cleared  
893 by centrifugation for 10 min ( $21,000 \times g$  and 4 °C) and supernatants were transferred into fresh Eppendorf tubes  
894 on ice. Protein pellets were soaked in 10 µl of 20% SDS for 5 min and completed to 100 µl with 100 mM Tris-  
895 HCl pH 7.5 and proteins were dissolved by shaking (1500 rpm) at room temperature for 1 hour. The protein  
896 concentration was determined using a Pierce™ BCA assay kit (Thermo Scientific™, USA). **Total GSH levels:**  
897 Clarified cell extracts were diluted 1:3 in 5% SSA. GSH standards (0, 10, 20, 30, 40, 50, 60, 70 µM) were  
898 prepared in 5 % SSA. Extracts and diluted samples were plated at 10 µl/well into 96-well plates in duplicate.  
899 **GSSG levels:** GSH standards (0, 0.5, 1, 2, 4, 8, 10, 20 µM) were prepared in 5 % SSA. Reduced glutathione  
900 (GSH) was derivatized to only measure oxidized glutathione (GSSG) levels. For this, 60 µl of standards and non-  
901 diluted extracts were transferred into fresh Eppendorf tubes. Samples were neutralized and derivatized by addition  
902 of 10 µl derivatization mix (2.25 µl 2-vinyl pyridine + 2.75 µl of Triethanolamine +5 µl H<sub>2</sub>O) and incubated for 1  
903 hour rotating head-over-head in the dark at 4 °C. Then, samples were plated at 10 µl/well into 96-well plates in  
904 duplicate. **Assay:** Wells were completed with 240 µl reaction buffer (all in 150 mM HEPES, 1 mM EDTA pH 7.5:  
905 150 µl 0.4 mM NADPH, 40 µl buffer, 50 µl 3 mM DTNB). The absorbance was measured for 35 cycles at room  
906 temperature monitoring the absorbance of TNB<sup>2-</sup> at  $\lambda = 412$  nm in 35 second intervals. Following 3 cycles of  
907 baseline readings, 50 µl of 0.8 mM NADPH in 150 mM HEPES, 1 mM EDTA pH 7.5 was rapidly added to each  
908 well and measurements were continued. The linear rate of TNB<sup>2-</sup> formation was calculated for standards and  
909 GSH[GSH<sub>Total</sub>] or GSSG[GSSG] levels of samples were interpolated from the standard curves. Glutathione level  
910 calculations:  $[\text{GSH}_{\text{Free}}] = [\text{GSH}_{\text{Total}}] - 2 \times [\text{GSSG}]$  |  $\text{GSSG content (\%)} = [\text{GSH}_{\text{Free}}] / 2 \times [\text{GSSG}] * 100$ .

## 912 **Overexpression of Glutathione Reductase in A549 cells**

913 Glutathione reductase lentiviral expression vector (pLV[Exp]-EGFP:T2A:Puro-EF1A>hGSR[NM\_000637.5])  
914 was purchased from VectorBuilder Inc. (China). Virus was produced by Lenti-X™ 293T cells (Takara Bio USA),

915 transfected with lentiviral expression vector (330 ng), as well as pPAx (550 ng) and pMD2 (330 ng) constructs  
916 using PolyFect™ transfer reagent (Qiagen). For transduction, viral supernatant was passed through a 0.45 µM  
917 syringe filter, Polybrene (10 µg/ml; Sigma) was added, and was transferred onto A549 cells seeded into a 24-well  
918 plate (1-2 ml/well). This step was repeated the following day. Cells were selected by addition of 2 µg/ml  
919 Puromycin (Gibco) for 10 days, changing the medium daily. Following selection, medium was replaced with  
920 standard culturing medium, a polyclonal fraction of cells was collected. Remaining cells were diluted to a  
921 concentration of 0.5 cells/100 µl and 100 µl were plated into 96-well plates to obtain single cell clones.  
922 Glutathione reductase overexpression was confirmed by western blot.

923

### 924 **Western blot**

925 For western blot analysis, cultured cells were washed with PBS and lysed in ice-cold RIPA buffer supplemented  
926 with EDTA-free cCOMPLETE protease inhibitor (Roche) on ice. Lysate was collected and clarified by  
927 centrifugation for 10 min (21,000 x g and 4 °C). The protein concentration was determined using a Pierce™ BCA  
928 assay kit (Thermo Scientific, USA). Lysate was adjusted to equal protein concentration across samples and  
929 diluted with 4x NuPAGE LDS sample buffer (Thermo Scientific, USA) containing 50 mM DTT (Sigma, USA)  
930 and samples were heated for 15 min at 65°C. Samples were separated on 4-12 % NuPAGE BisTris (Thermo  
931 Scientific, USA) gels using MOPS SDS running buffer (Thermo Scientific, USA). Proteins were transferred to  
932 PVDF membranes using the iBLOT2 transfer system (Thermo Scientific, USA) with iBLOT2 PVDF transfer  
933 stacks (Thermo Scientific, USA). Membranes were blocked with 3% BSA (Sigma, USA) in TBS + 0.1% Tween  
934 (Boston BioProducts, USA). Primary antibodies (GSR Polyclonal Antibody (Rabbit, Proteintech: #18257-1-AP);  
935 GAPDH Monoclonal Antibody (Mouse, Proteintech: #60004-1-Ig)) were diluted 1:1000 in TBS + 0.1% Tween  
936 (Boston BioProducts, USA) containing 3% BSA (Sigma, USA), and membranes were incubated with antibodies  
937 over-night at 4°C. Membranes were washed three times with TBS + 0.1% Tween (Boston BioProducts, USA)  
938 followed by incubation for 1 hour at room temperature in the dark in with secondary antibodies (Anti-rabbit: IgG  
939 DyLight 800, Anti-mouse: IgG DyLight 680 (Cell Signaling Technologies, USA)), dissolved at 1:15,000 dilution  
940 TBS + 0.1% Tween (Boston BioProducts, USA) containing 3% BSA (Sigma, USA). Membranes were washed  
941 three times with TBS + 0.1% Tween (Boston BioProducts, USA) and membranes were scanned using an Odyssey  
942 DLx (LI-COR Biosciences, USA) scanner.

943

### 944 **Quantification and Statistical Analysis**

945

946 Data processing and statistical analysis was performed using the pipeline described in the section above.  
947 Alternatively, data was visualized, and statistical analysis was performed using the Prism 10.0 software  
948 (Graphpad, USA). All data are represented as mean ± S.E.M., unless specified otherwise. Significance was  
949 calculated using two-tailed Student's t test for pairwise comparison of variables. Fisher's exact test was used for  
950 enrichment analyses. P values of hypergeometric tests were corrected for multiple comparisons using the  
951 Benjamini-Hochberg procedure<sup>77</sup>. For proteomics analysis at least triplicates were analyzed for each condition.  
952 Within plate-reader based assays, technical replicates (duplicates or triplicates) of the same sample were analyzed.  
953 The p (associated probability) value was considered significant if < 0.05 and significance was indicated as  
954 follows: \*p < 0.05; \*\*p < 0.01; \*\*\*p < 0.001, \*\*\*\*p < 0.0001.

955

### 956 **Figures**

957

958 Figures were prepared in Adobe Illustrator 2022, Graphpad Prism 10.0, PyMOL (Version 2.3.1 and Version 2.5),  
959 R (Version 4.2) and Python (Version 3.7).

960

### 961 **Acknowledgements**

962

963 E.T.C: This work was supported by the Claudia Adams Barr Program, the Lavine Family Fund, the Pew  
964 Charitable Trust, NIH DK123095, NIH AG071966, The Smith Family Foundation, and the American Federation  
965 for Aging Research.

966 N.B. is supported by the Deutsche Forschungsgemeinschaft (DFG, German research foundation: Projektnummer  
967 501493132).

968 M.J.M. is supported by the Deutsche Forschungsgemeinschaft (DFG, German research foundation:  
969 Projektnummer 461079553).

970 H.X. is supported by the NIH (NIH K99AG073461)

971 L.H.M.B. was supported by the American Heart Association (926512)

972 H-G.S. is supported by Hope Funds for Cancer Research HFCR-20-03-01-02.

973 Y.S. is supported by the NIH (K01DK132455)

974 N.D. was supported by the NIH (T32CA236754)

975 P.L.-M. is supported by the NIH NIDDK (K99DK133502)

976 J.J.P. is supported by the NIH (K00AG073493)

977 We thank Sam Ireland and Andrew C.R. Martin for providing the ZincBind dataset.

978 We thank Jan Lj. Miljkovic for comments and suggestions.

979

## 980 **Author Contributions**

981

982 N.B. and E.T.C. carried out study conception and design.

983 N.B. designed and performed most experiments, analyzed data, interpreted results and prepared figures.

984 M.J.M. assisted with GSR validation experiments.

985 H.X. assisted with LC-MS experiments, data interpretation and analysis.

986 L.H.M.B. assisted with the generation of over-expression cell lines.

987 S.S. assisted with LC-MS experiments and cell viability assays.

988 S.W. assisted with data analysis.

989 H-G.S. assisted with GSR validation experiments.

990 Y.S. performed ITC measurements with assistance of N.B.

991 N.D. assisted with LC-MS experiments.

992 J.J.P. assisted with GSR validation experiments.

993 P.L.-M. assisted with recombinant protein work.

994 Y.Z. and J.C. performed structural motif analysis, modeling of zinc binding and interpretation.

995 The manuscript was written by E.T.C and N.B. with help of all authors.

996 E.T.C. directed the study.

997

## 998 **Declaration of Interest**

999

1000 E.T.C. is a co-founder, equity holder, and board member of Matchpoint Therapeutics and a co-founder and equity  
1001 holder in Aevum Therapeutics.

1002

## 1003 **References**

1004

1005 1. Krężel, A., and Maret, W. (2016). The biological inorganic chemistry of zinc ions. *Archives of Biochemistry*  
1006 *and Biophysics* 611, 3–19. 10.1016/j.abb.2016.04.010.

1007 2. Maret, W. (2015). Analyzing free zinc(ii) ion concentrations in cell biology with fluorescent chelating  
1008 molecules. *Metallomics* 7, 202–211. 10.1039/c4mt00230j.

1009 3. Maret, W. (2017). Zinc in Cellular Regulation: The Nature and Significance of “Zinc Signals.” *International*  
1010 *Journal of Molecular Sciences* 18, 2285. 10.3390/ijms18112285.

1011 4. Passerini, A., Andreini, C., Menchetti, S., Rosato, A., and Frasconi, P. (2007). Predicting zinc binding at the  
1012 proteome level. *BMC Bioinformatics* 8, 39. 10.1186/1471-2105-8-39.

- 1013 5. Andreini, C., Banci, L., Bertini, I., and Rosato, A. (2006). Counting the Zinc-Proteins Encoded in the Human  
1014 Genome. *J. Proteome Res.* 5, 196–201. 10.1021/pr050361j.
- 1015 6. Ireland, S.M., and Martin, A.C.R. (2019). ZincBind—the database of zinc binding sites. *Database* 2019,  
1016 baz006. 10.1093/database/baz006.
- 1017 7. Pace, N.J., and Weerapana, E. (2014). Zinc-Binding Cysteines: Diverse Functions and Structural Motifs.  
1018 *Biomolecules* 4, 419–434. 10.3390/biom4020419.
- 1019 8. Pace, N.J., and Weerapana, E. (2013). A Competitive Chemical-Proteomic Platform To Identify Zinc-Binding  
1020 Cysteines. ACS Publications. 10.1021/cb400622q.
- 1021 9. Peris-Díaz, M.D., Guran, R., Zitka, O., Adam, V., and Krężel, A. (2020). Metal- and Affinity-Specific Dual  
1022 Labeling of Cysteine-Rich Proteins for Identification of Metal-Binding Sites. *Anal. Chem.* 92, 12950–12958.  
1023 10.1021/acs.analchem.0c01604.
- 1024 10. Xiao, H., Jedrychowski, M.P., Schweppe, D.K., Huttlin, E.L., Yu, Q., Heppner, D.E., Li, J., Long, J.,  
1025 Mills, E.L., Szpyt, J., et al. (2020). A Quantitative Tissue-Specific Landscape of Protein Redox Regulation  
1026 during Aging. *Cell* 180, 968–983.e24. 10.1016/j.cell.2020.02.012.
- 1027 11. Darabedian, N., Ji, W., Fan, M., Lin, S., Seo, H.-S., Vinogradova, E.V., Yaron, T.M., Mills, E.L., Xiao,  
1028 H., Senkane, K., et al. (2023). Depletion of creatine phosphagen energetics with a covalent creatine kinase  
1029 inhibitor. *Nat Chem Biol* 19, 815–824. 10.1038/s41589-023-01273-x.
- 1030 12. Huttlin, E.L., Bruckner, R.J., Navarrete-Perea, J., Cannon, J.R., Baltier, K., Gebreab, F., Gygi, M.P.,  
1031 Thornock, A., Zarraga, G., Tam, S., et al. (2021). Dual proteome-scale networks reveal cell-specific  
1032 remodeling of the human interactome. *Cell* 184, 3022–3040.e28. 10.1016/j.cell.2021.04.011.
- 1033 13. Li, J., Cai, Z., Vaites, L.P., Shen, N., Mitchell, D.C., Huttlin, E.L., Paulo, J.A., Harry, B.L., and Gygi,  
1034 S.P. (2021). Proteome-wide mapping of short-lived proteins in human cells. *Molecular Cell* 81, 4722–4735.e5.  
1035 10.1016/j.molcel.2021.09.015.
- 1036 14. Ryu, J.M., Lee, M.Y., Yun, S.P., and Han, H.J. (2009). Zinc chloride stimulates DNA synthesis of mouse  
1037 embryonic stem cells: Involvement of PI3K/Akt, MAPKs, and mTOR. *Journal of Cellular Physiology* 218,  
1038 558–567. 10.1002/jcp.21628.
- 1039 15. Salesa, B., Sabater i Serra, R., and Serrano-Aroca, Á. (2021). Zinc Chloride: Time-Dependent  
1040 Cytotoxicity, Proliferation and Promotion of Glycoprotein Synthesis and Antioxidant Gene Expression in  
1041 Human Keratinocytes. *Biology (Basel)* 10, 1072. 10.3390/biology10111072.
- 1042 16. Hu, J., Yang, Z., Wang, J., Yu, J., Guo, J., Liu, S., Qian, C., Song, L., Wu, Y., and Cheng, J. (2016). Zinc  
1043 Chloride Transiently Maintains Mouse Embryonic Stem Cell Pluripotency by Activating Stat3 Signaling.  
1044 *PLoS ONE* 11, e0148994. 10.1371/journal.pone.0148994.
- 1045 17. Li, J., Van Vranken, J.G., Pontano Vaites, L., Schweppe, D.K., Huttlin, E.L., Etienne, C., Nandhikonda,  
1046 P., Viner, R., Robitaille, A.M., Thompson, A.H., et al. (2020). TMTpro reagents: a set of isobaric labeling  
1047 mass tags enables simultaneous proteome-wide measurements across 16 samples. *Nat Methods* 17, 399–404.  
1048 10.1038/s41592-020-0781-4.

- 1049 18. Li, J., Cai, Z., Bomgardner, R.D., Pike, I., Kuhn, K., Rogers, J.C., Roberts, T.M., Gygi, S.P., and Paulo,  
1050 J.A. (2021). TMTpro-18plex: The Expanded and Complete Set of TMTpro Reagents for Sample Multiplexing.  
1051 *J. Proteome Res.* 20, 2964–2972. 10.1021/acs.jproteome.1c00168.
- 1052 19. Taylor, A. (1996). Detection and Monitoring of Disorders of Essential Trace Elements. *Ann Clin*  
1053 *Biochem* 33, 486–510. 10.1177/000456329603300603.
- 1054 20. Thul, P.J., Åkesson, L., Wiking, M., Mahdessian, D., Geladaki, A., Ait Blal, H., Alm, T., Asplund, A.,  
1055 Björk, L., Breckels, L.M., et al. (2017). A subcellular map of the human proteome. *Science* 356, eaal3321.  
1056 10.1126/science.aal3321.
- 1057 21. The UniProt Consortium (2023). UniProt: the Universal Protein Knowledgebase in 2023. *Nucleic Acids*  
1058 *Research* 51, D523–D531. 10.1093/nar/gkac1052.
- 1059 22. Galcheva-Gargova, Z., Konstantinov, K.N., Wu, I.-H., Klier, F.G., Barrett, T., and Davis, R.J. (1996).  
1060 Binding of Zinc Finger Protein ZPR1 to the Epidermal Growth Factor Receptor. *Science* 272, 1797–1802.  
1061 10.1126/science.272.5269.1797.
- 1062 23. Doran, B., Gherbesi, N., Hendricks, G., Flavell, R.A., Davis, R.J., and Gangwani, L. (2006). Deficiency  
1063 of the zinc finger protein ZPR1 causes neurodegeneration. *Proceedings of the National Academy of Sciences*  
1064 103, 7471–7475. 10.1073/pnas.0602057103.
- 1065 24. Sabbarini, I.M., Reif, D., McQuown, A.J., Nelliatt, A.R., Prince, J., Membreno, B.S., Wu, C.C.-C.,  
1066 Murray, A.W., and Denic, V. (2023). Zinc-finger protein Zpr1 is a bespoke chaperone essential for eEF1A  
1067 biogenesis. *Molecular Cell* 83, 252-265.e13. 10.1016/j.molcel.2022.12.012.
- 1068 25. Kmita, K., Wirth, C., Warnau, J., Guerrero-Castillo, S., Hunte, C., Hummer, G., Kaila, V.R.I., Zwicker,  
1069 K., Brandt, U., and Zickermann, V. (2015). Accessory NUMM (NDUFS6) subunit harbors a Zn-binding site  
1070 and is essential for biogenesis of mitochondrial complex I. *Proceedings of the National Academy of Sciences*  
1071 112, 5685–5690. 10.1073/pnas.1424353112.
- 1072 26. Stroud, D.A., Surgenor, E.E., Formosa, L.E., Reljic, B., Frazier, A.E., Dibley, M.G., Osellame, L.D.,  
1073 Stait, T., Beilharz, T.H., Thorburn, D.R., et al. (2016). Accessory subunits are integral for assembly and  
1074 function of human mitochondrial complex I. *Nature* 538, 123–126. 10.1038/nature19754.
- 1075 27. Parey, K., Haapanen, O., Sharma, V., Köfeler, H., Züllig, T., Prinz, S., Siegmund, K., Wittig, I., Mills,  
1076 D.J., Vonck, J., et al. (2019). High-resolution cryo-EM structures of respiratory complex I: Mechanism,  
1077 assembly, and disease. *Science Advances* 5, eaax9484. 10.1126/sciadv.aax9484.
- 1078 28. Scheffzek, K., Klebe, C., Fritz-Wolf, K., Kabsch, W., and Wittinghofer, A. (1995). Crystal structure of  
1079 the nuclear Ras-related protein Ran in its GDP-bound form. *Nature* 374, 378–381. 10.1038/374378a0.
- 1080 29. Boudhraa, Z., Carmona, E., Provencher, D., and Mes-Masson, A.-M. (2020). Ran GTPase: A Key Player  
1081 in Tumor Progression and Metastasis. *Frontiers in Cell and Developmental Biology* 8.
- 1082 30. Günther, V., Lindert, U., and Schaffner, W. (2012). The taste of heavy metals: Gene regulation by MTF-  
1083 1. *Biochimica et Biophysica Acta (BBA) - Molecular Cell Research* 1823, 1416–1425.  
1084 10.1016/j.bbamcr.2012.01.005.
- 1085 31. Potter, B.M., Feng, L.S., Parasuram, P., Matskevich, V.A., Wilson, J.A., Andrews, G.K., and Laity, J.H.  
1086 (2005). The Six Zinc Fingers of Metal-responsive Element Binding Transcription Factor-1 Form Stable and

- 1087 Quasi-ordered Structures with Relatively Small Differences in Zinc Affinities \*. *Journal of Biological*  
1088 *Chemistry* 280, 28529–28540. 10.1074/jbc.M505217200.
- 1089 32. Guerrero, A.L., and Berg, J.M. (2004). Metal Ion Affinities of the Zinc Finger Domains of the Metal  
1090 Responsive Element-Binding Transcription Factor-1 (MTF1). *Biochemistry* 43, 5437–5444.  
1091 10.1021/bi0358418.
- 1092 33. Hekkelman, M.L., de Vries, I., Joosten, R.P., and Perrakis, A. (2023). AlphaFill: enriching AlphaFold  
1093 models with ligands and cofactors. *Nat Methods* 20, 205–213. 10.1038/s41592-022-01685-y.
- 1094 34. Grant, C.E., and Bailey, T.L. (2021). XSTREME: Comprehensive motif analysis of biological sequence  
1095 datasets. Preprint at bioRxiv, 10.1101/2021.09.02.458722 10.1101/2021.09.02.458722.
- 1096 35. Irving, H., and Williams, R.J.P. (1948). Order of Stability of Metal Complexes. *Nature* 162, 746–747.  
1097 10.1038/162746a0.
- 1098 36. Dudev, T., and Nikolova, V. (2016). Determinants of Fe<sup>2+</sup> over M<sup>2+</sup> (M = Mg, Mn, Zn) Selectivity in  
1099 Non-Heme Iron Proteins. *Inorg. Chem.* 55, 12644–12650. 10.1021/acs.inorgchem.6b01822.
- 1100 37. Petros, A.K., Reddi, A.R., Kennedy, M.L., Hyslop, A.G., and Gibney, B.R. (2006). Femtomolar Zn(II)  
1101 Affinity in a Peptide-Based Ligand Designed To Model Thiolate-Rich Metalloprotein Active Sites. *Inorg.*  
1102 *Chem.* 45, 9941–9958. 10.1021/ic052190q.
- 1103 38. Ivan, M., and Kaelin, W.G. (2017). The EGLN-HIF O<sub>2</sub>-Sensing System: Multiple Inputs and Feedbacks.  
1104 *Molecular Cell* 66, 772–779. 10.1016/j.molcel.2017.06.002.
- 1105 39. Lee, P., Chandel, N.S., and Simon, M.C. (2020). Cellular adaptation to hypoxia through hypoxia  
1106 inducible factors and beyond. *Nat Rev Mol Cell Biol* 21, 268–283. 10.1038/s41580-020-0227-y.
- 1107 40. Cory, S.A., Van Vranken, J.G., Brignole, E.J., Patra, S., Winge, D.R., Drennan, C.L., Rutter, J., and  
1108 Barondeau, D.P. (2017). Structure of human Fe–S assembly subcomplex reveals unexpected cysteine  
1109 desulfurase architecture and acyl-ACP–ISD11 interactions. *Proceedings of the National Academy of Sciences*  
1110 114, E5325–E5334. 10.1073/pnas.1702849114.
- 1111 41. Lill, R. (2009). Function and biogenesis of iron–sulphur proteins. *Nature* 460, 831–838.  
1112 10.1038/nature08301.
- 1113 42. Maio, N., and Rouault, T.A. (2020). Outlining the Complex Pathway of Mammalian Fe-S Cluster  
1114 Biogenesis. *Trends Biochem Sci* 45, 411–426. 10.1016/j.tibs.2020.02.001.
- 1115 43. Fox, N.G., Yu, X., Feng, X., Bailey, H.J., Martelli, A., Nabhan, J.F., Strain-Damerell, C., Bulawa, C.,  
1116 Yue, W.W., and Han, S. (2019). Structure of the human frataxin-bound iron-sulfur cluster assembly complex  
1117 provides insight into its activation mechanism. *Nat Commun* 10, 2210. 10.1038/s41467-019-09989-y.
- 1118 44. Boniecki, M.T., Freibert, S.A., Mühlhoff, U., Lill, R., and Cygler, M. (2017). Structure and functional  
1119 dynamics of the mitochondrial Fe/S cluster synthesis complex. *Nat Commun* 8, 1287. 10.1038/s41467-017-  
1120 01497-1.
- 1121 45. Fox, N.G., Martelli, A., Nabhan, J.F., Janz, J., Borkowska, O., Bulawa, C., and Yue, W.W. (2018).  
1122 Zinc(II) binding on human wild-type ISCU and Met140 variants modulates NFS1 desulfurase activity.  
1123 *Biochimie* 152, 211–218. 10.1016/j.biochi.2018.07.012.

- 1124 46. Ramelot, T.A., Cort, J.R., Goldsmith-Fischman, S., Kornhaber, G.J., Xiao, R., Shastry, R., Acton, T.B.,  
1125 Honig, B., Montelione, G.T., and Kennedy, M.A. (2004). Solution NMR Structure of the Iron–Sulfur Cluster  
1126 Assembly Protein U (IscU) with Zinc Bound at the Active Site. *Journal of Molecular Biology* *344*, 567–583.  
1127 10.1016/j.jmb.2004.08.038.
- 1128 47. Kornhaber, G.J., Snyder, D., Moseley, H.N.B., and Montelione, G.T. (2006). Identification of Zinc-  
1129 ligated Cysteine Residues Based on  $^{13}\text{C}\alpha$  and  $^{13}\text{C}\beta$  Chemical Shift Data. *J Biomol NMR* *34*, 259–269.  
1130 10.1007/s10858-006-0027-5.
- 1131 48. Roy, P., Bauman, M.A., Almutairi, H.H., Jayawardhana, W.G., Johnson, N.M., and Torelli, A.T. (2018).  
1132 Comparison of the Response of Bacterial IscU and SufU to  $\text{Zn}^{2+}$  and Select Transition-Metal Ions. *ACS*  
1133 *Chem. Biol.* *13*, 591–599. 10.1021/acscchembio.7b00442.
- 1134 49. Li, J., Ren, X., Fan, B., Huang, Z., Wang, W., Zhou, H., Lou, Z., Ding, H., Lyu, J., and Tan, G. (2019).  
1135 Zinc Toxicity and Iron-Sulfur Cluster Biogenesis in *Escherichia coli*. *Applied and Environmental*  
1136 *Microbiology* *85*, e01967-18. 10.1128/AEM.01967-18.
- 1137 50. Iannuzzi, C., Adrover, M., Puglisi, R., Yan, R., Temussi, P.A., and Pastore, A. (2014). The role of zinc in  
1138 the stability of the marginally stable IscU scaffold protein. *Protein Science* *23*, 1208–1219. 10.1002/pro.2501.
- 1139 51. Patra, S., and Barondeau, D.P. (2019). Mechanism of activation of the human cysteine desulfurase  
1140 complex by frataxin. *Proc Natl Acad Sci U S A* *116*, 19421–19430. 10.1073/pnas.1909535116.
- 1141 52. Parent, A., Elduque, X., Cornu, D., Belot, L., Le Caer, J.-P., Grandas, A., Toledano, M.B., and  
1142 D’Auréaux, B. (2015). Mammalian frataxin directly enhances sulfur transfer of NFS1 persulfide to both ISCU  
1143 and free thiols. *Nat Commun* *6*, 5686. 10.1038/ncomms6686.
- 1144 53. Gervason, S., Larkem, D., Mansour, A.B., Botzanowski, T., Müller, C.S., Pecqueur, L., Le Pavec, G.,  
1145 Delaunay-Moisan, A., Brun, O., Agramunt, J., et al. (2019). Physiologically relevant reconstitution of iron-  
1146 sulfur cluster biosynthesis uncovers persulfide-processing functions of ferredoxin-2 and frataxin. *Nat Commun*  
1147 *10*, 3566. 10.1038/s41467-019-11470-9.
- 1148 54. Srour, B., Gervason, S., Hooek, M.H., Monfort, B., Want, K., Larkem, D., Trabelsi, N., Landrot, G.,  
1149 Zitolo, A., Fonda, E., et al. (2022). Iron Insertion at the Assembly Site of the ISCU Scaffold Protein Is a  
1150 Conserved Process Initiating Fe–S Cluster Biosynthesis. *J. Am. Chem. Soc.* *144*, 17496–17515.  
1151 10.1021/jacs.2c06338.
- 1152 55. P. Bennett, S., C. Crack, J., Puglisi, R., Pastore, A., and Brun, N.E.L. (2023). Native mass spectrometric  
1153 studies of IscSU reveal a concerted, sulfur-initiated mechanism of iron–sulfur cluster assembly. *Chemical*  
1154 *Science* *14*, 78–95. 10.1039/D2SC04169C.
- 1155 56. Tsutsumi, E., Niwa, S., Takeda, R., Sakamoto, N., Okatsu, K., Fukai, S., Ago, H., Nagao, S., Sekiguchi,  
1156 H., and Takeda, K. (2023). Structure of a putative immature form of a Rieske-type iron-sulfur protein in  
1157 complex with zinc chloride. *Commun Chem* *6*, 1–10. 10.1038/s42004-023-01000-6.
- 1158 57. Metzger, M.B., Pruneda, J.N., Klevit, R.E., and Weissman, A.M. (2014). RING-type E3 ligases: Master  
1159 manipulators of E2 ubiquitin-conjugating enzymes and ubiquitination. *Biochim Biophys Acta* *1843*, 47–60.  
1160 10.1016/j.bbamcr.2013.05.026.
- 1161 58. Wang, J., and Chen, Y. (2010). Role of the  $\text{Zn}^{2+}$  Motif of E1 in SUMO Adenylation. *J Biol Chem* *285*,  
1162 23732–23738. 10.1074/jbc.M110.114660.



- 1163 59. Gonçalves, E., Poulos, R.C., Cai, Z., Barthorpe, S., Manda, S.S., Lucas, N., Beck, A., Bucio-Noble, D.,  
1164 Dausmann, M., Hall, C., et al. (2022). Pan-cancer proteomic map of 949 human cell lines. *Cancer Cell* 40, 835-  
1165 849.e8. 10.1016/j.ccell.2022.06.010.
- 1166 60. Li, H., Ning, S., Ghandi, M., Kryukov, G.V., Gopal, S., Deik, A., Souza, A., Pierce, K., Keskula, P.,  
1167 Hernandez, D., et al. (2019). The landscape of cancer cell line metabolism. *Nat Med* 25, 850–860.  
1168 10.1038/s41591-019-0404-8.
- 1169 61. Ortega, A.L., Mena, S., and Estrela, J.M. (2011). Glutathione in Cancer Cell Death. *Cancers* 3, 1285–  
1170 1310. 10.3390/cancers3011285.
- 1171 62. Cheng, X., Xu, H.-D., Ran, H.-H., Liang, G., and Wu, F.-G. (2021). Glutathione-Depleting  
1172 Nanomedicines for Synergistic Cancer Therapy. *ACS Nano* 15, 8039–8068. 10.1021/acsnano.1c00498.
- 1173 63. Berkholtz, D.S., Faber, H.R., Savvides, S.N., and Karplus, P.A. (2008). Catalytic Cycle of Human  
1174 Glutathione Reductase Near 1 Å Resolution. *Journal of Molecular Biology* 382, 371–384.  
1175 10.1016/j.jmb.2008.06.083.
- 1176 64. Pai, E.F., and Schulz, G.E. (1983). The catalytic mechanism of glutathione reductase as derived from x-  
1177 ray diffraction analyses of reaction intermediates. *Journal of Biological Chemistry* 258, 1752–1757.  
1178 10.1016/S0021-9258(18)33050-3.
- 1179 65. Booty, L.M., Gawel, J.M., Cvetko, F., Caldwell, S.T., Hall, A.R., Mulvey, J.F., James, A.M., Hinchy,  
1180 E.C., Prime, T.A., Arndt, S., et al. (2019). Selective Disruption of Mitochondrial Thiol Redox State in Cells  
1181 and In Vivo. *Cell Chemical Biology* 26, 449-461.e8. 10.1016/j.chembiol.2018.12.002.
- 1182 66. Scarlett, J.L., Packer, M.A., Porteous, C.M., and Murphy, M.P. (1996). Alterations to glutathione and  
1183 nicotinamide nucleotides during the mitochondrial permeability transition induced by peroxynitrite.  
1184 *Biochemical Pharmacology* 52, 1047–1055. 10.1016/0006-2952(96)99426-5.
- 1185 67. Rahman, I., Kode, A., and Biswas, S.K. (2006). Assay for quantitative determination of glutathione and  
1186 glutathione disulfide levels using enzymatic recycling method. *Nat Protoc* 1, 3159–3165.  
1187 10.1038/nprot.2006.378.
- 1188 68. Yan, T., Desai, H.S., Boatner, L.M., Yen, S.L., Cao, J., Palafox, M.F., Jami-Alahmadi, Y., and Backus,  
1189 K.M. (2021). SP3-FAIMS Chemoproteomics for High-Coverage Profiling of the Human Cysteinome.  
1190 *ChemBioChem* 22, 1841–1851. 10.1002/cbic.202000870.
- 1191 69. Jumper, J., Evans, R., Pritzel, A., Green, T., Figurnov, M., Ronneberger, O., Tunyasuvunakool, K., Bates,  
1192 R., Žídek, A., Potapenko, A., et al. (2021). Highly accurate protein structure prediction with AlphaFold. *Nature*  
1193 596, 583–589. 10.1038/s41586-021-03819-2.
- 1194 70. Schweppe, D.K., Prasad, S., Belford, M.W., Navarrete-Perea, J., Bailey, D.J., Huguet, R., Jedrychowski,  
1195 M.P., Rad, R., McAlister, G., Abbatiello, S.E., et al. (2019). Characterization and Optimization of Multiplexed  
1196 Quantitative Analyses Using High-Field Asymmetric-Waveform Ion Mobility Mass Spectrometry. *Anal.*  
1197 *Chem.* 91, 4010–4016. 10.1021/acs.analchem.8b05399.
- 1198 71. McAlister, G.C., Nusinow, D.P., Jedrychowski, M.P., Wühr, M., Huttlin, E.L., Erickson, B.K., Rad, R.,  
1199 Haas, W., and Gygi, S.P. (2014). MultiNotch MS3 Enables Accurate, Sensitive, and Multiplexed Detection of  
1200 Differential Expression across Cancer Cell Line Proteomes. *Anal. Chem.* 86, 7150–7158. 10.1021/ac502040v.

- 1201 72. Eng, J.K., Jahan, T.A., and Hoopmann, M.R. (2013). Comet: An open-source MS/MS sequence database  
1202 search tool. *PROTEOMICS* 13, 22–24. 10.1002/pmic.201200439.
- 1203 73. Huttlin, E.L., Jedrychowski, M.P., Elias, J.E., Goswami, T., Rad, R., Beausoleil, S.A., Villén, J., Haas,  
1204 W., Sowa, M.E., and Gygi, S.P. (2010). A Tissue-Specific Atlas of Mouse Protein Phosphorylation and  
1205 Expression. *Cell* 143, 1174–1189. 10.1016/j.cell.2010.12.001.
- 1206 74. Elias, J.E., and Gygi, S.P. (2007). Target-decoy search strategy for increased confidence in large-scale  
1207 protein identifications by mass spectrometry. *Nat Methods* 4, 207–214. 10.1038/nmeth1019.
- 1208 75. Peng, J., Schwartz, D., Elias, J.E., Thoreen, C.C., Cheng, D., Marsischky, G., Roelofs, J., Finley, D., and  
1209 Gygi, S.P. (2003). A proteomics approach to understanding protein ubiquitination. *Nat Biotechnol* 21, 921–  
1210 926. 10.1038/nbt849.
- 1211 76. Beausoleil, S.A., Villén, J., Gerber, S.A., Rush, J., and Gygi, S.P. (2006). A probability-based approach  
1212 for high-throughput protein phosphorylation analysis and site localization. *Nat Biotechnol* 24, 1285–1292.  
1213 10.1038/nbt1240.
- 1214 77. Benjamini, Y., and Hochberg, Y. (1995). Controlling the False Discovery Rate: A Practical and Powerful  
1215 Approach to Multiple Testing. *Journal of the Royal Statistical Society: Series B (Methodological)* 57, 289–  
1216 300. 10.1111/j.2517-6161.1995.tb02031.x.
- 1217 78. McInnes, L., Healy, J., and Melville, J. (2020). UMAP: Uniform Manifold Approximation and Projection  
1218 for Dimension Reduction. Preprint at arXiv, 10.48550/arXiv.1802.03426 10.48550/arXiv.1802.03426.
- 1219 79. Tunyasuvunakool, K., Adler, J., Wu, Z., Green, T., Zielinski, M., Žídek, A., Bridgland, A., Cowie, A.,  
1220 Meyer, C., Laydon, A., et al. (2021). Highly accurate protein structure prediction for the human proteome.  
1221 *Nature* 596, 590–596. 10.1038/s41586-021-03828-1.

Figure 1

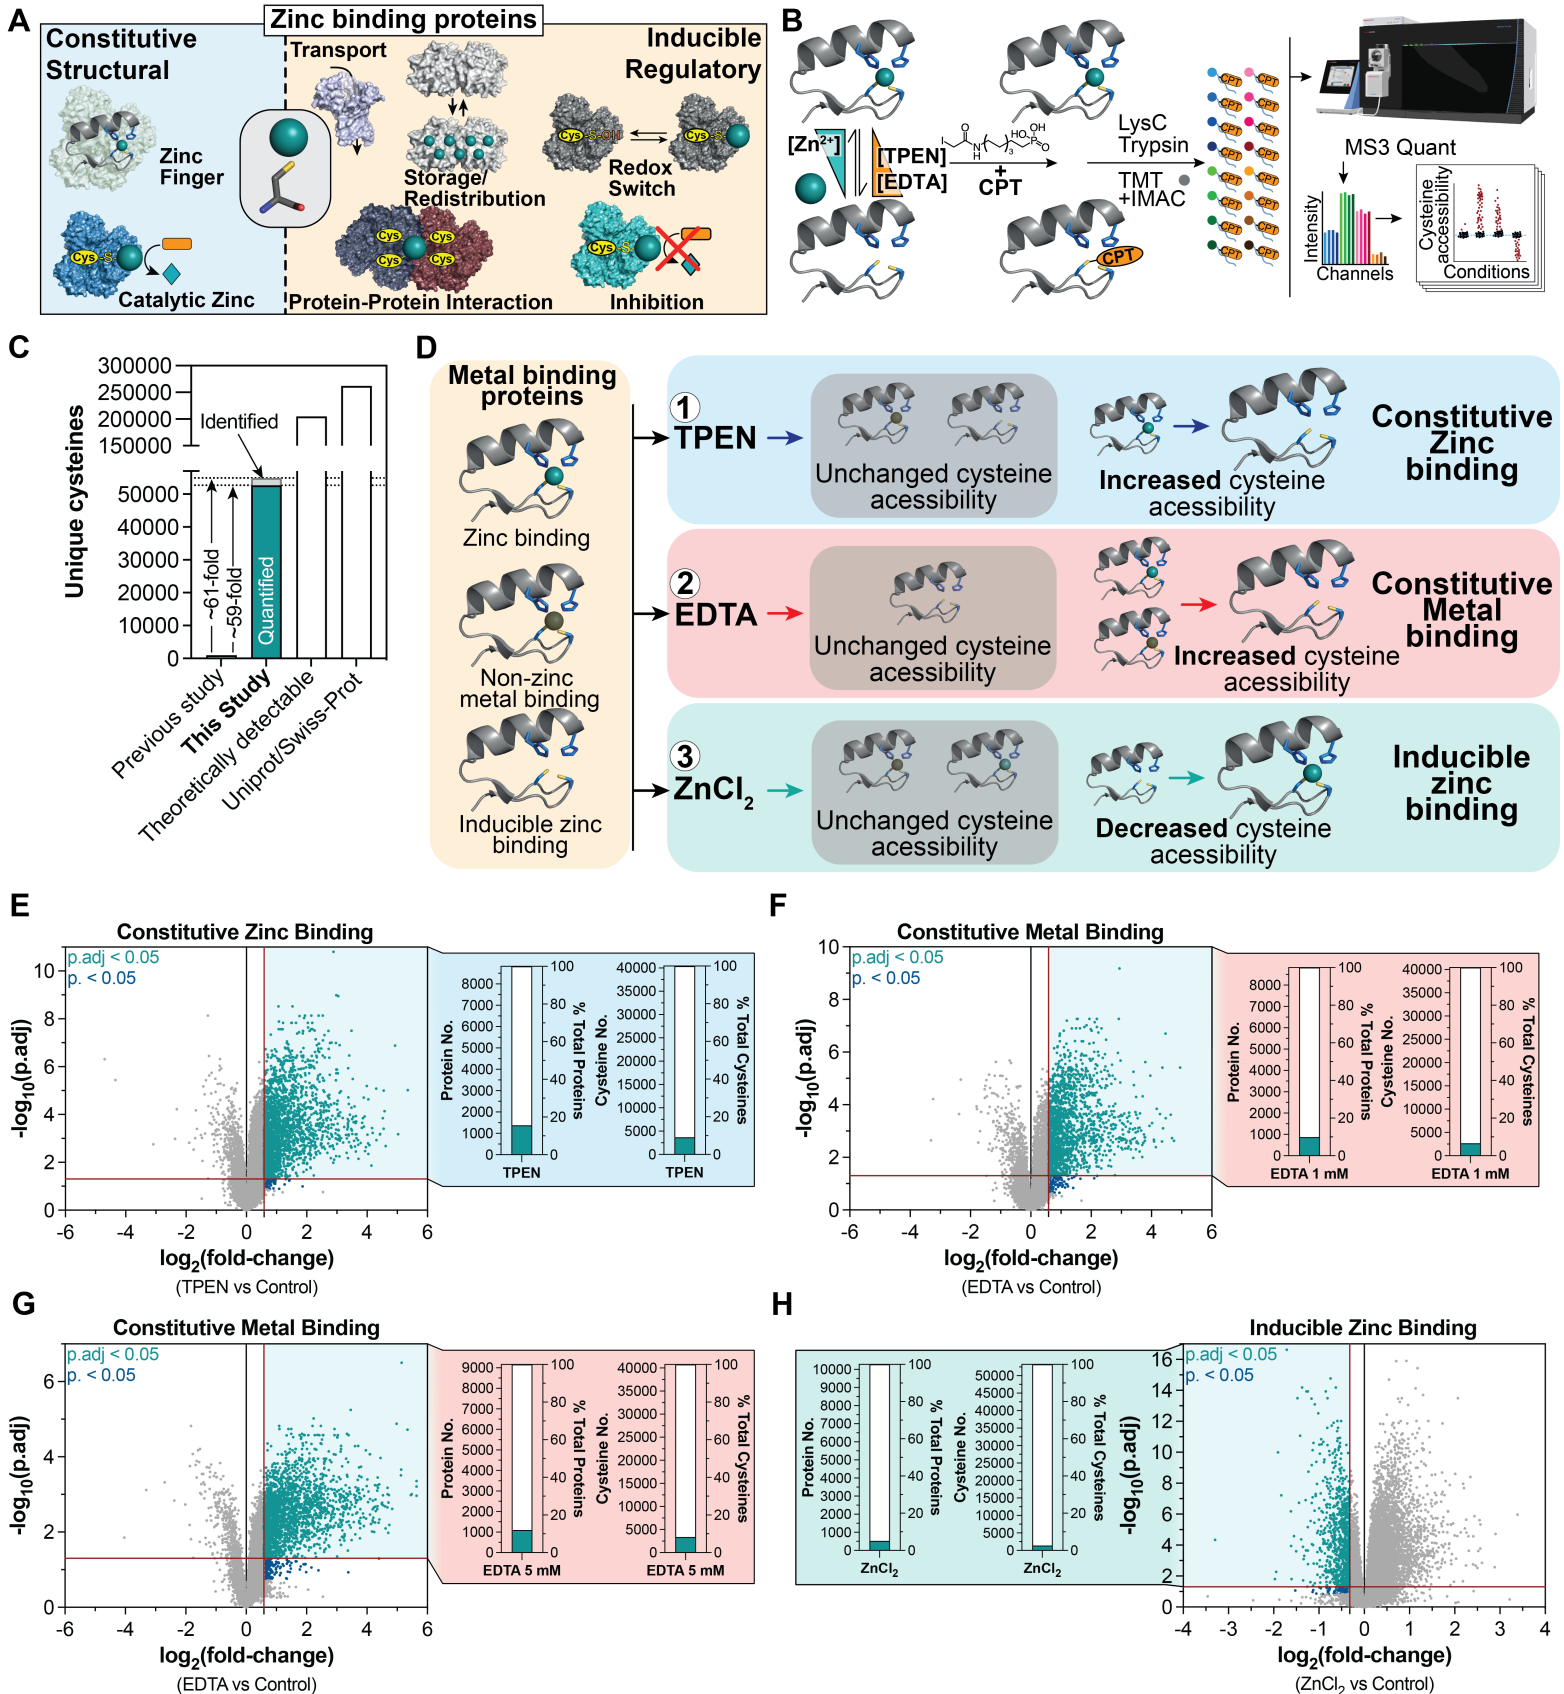

Figure 2

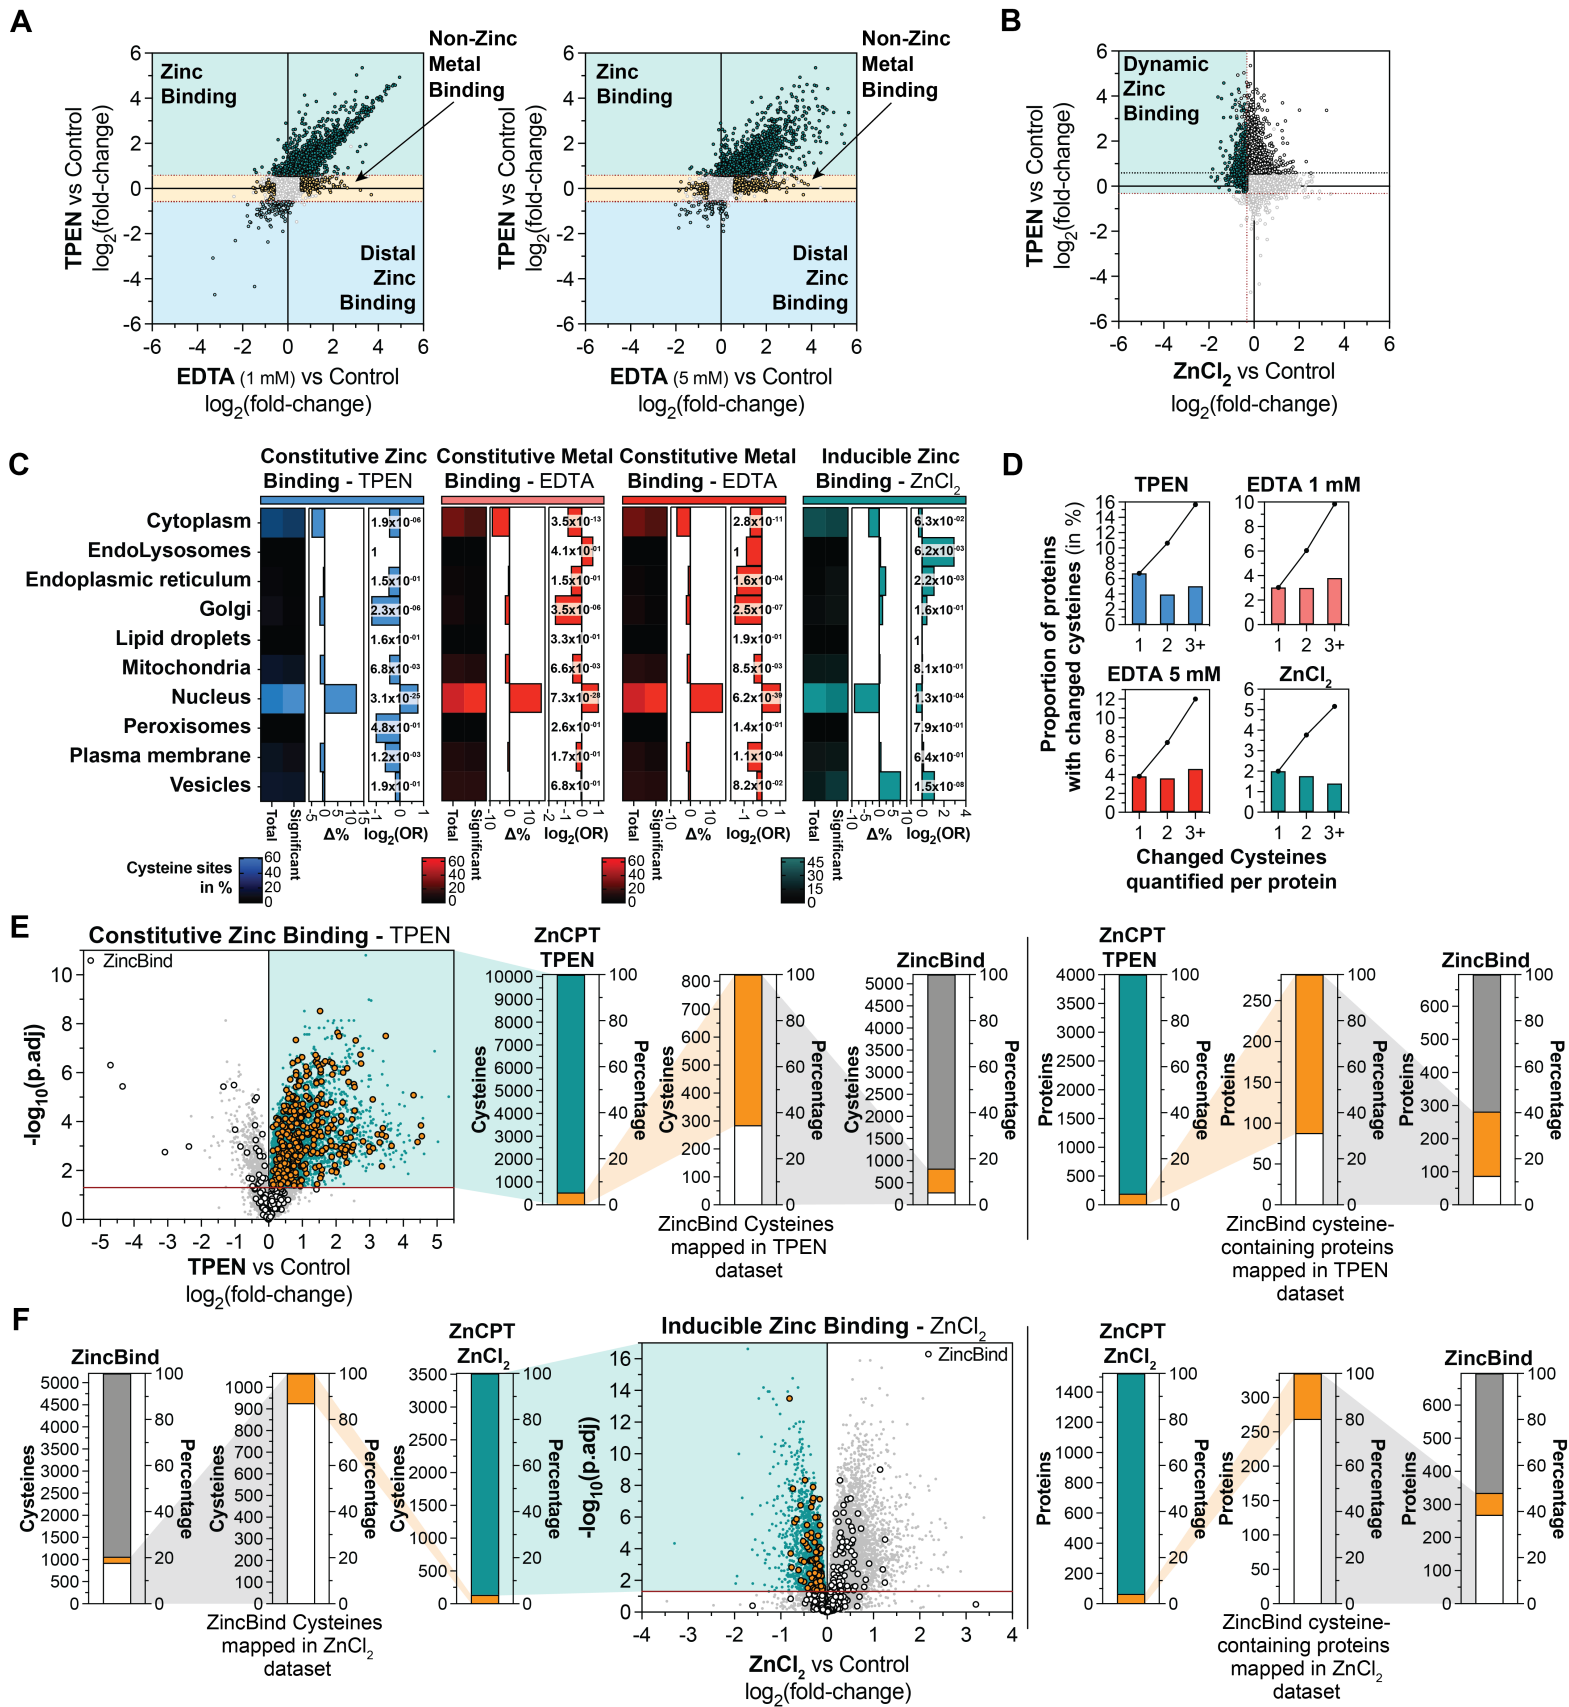

Figure 3

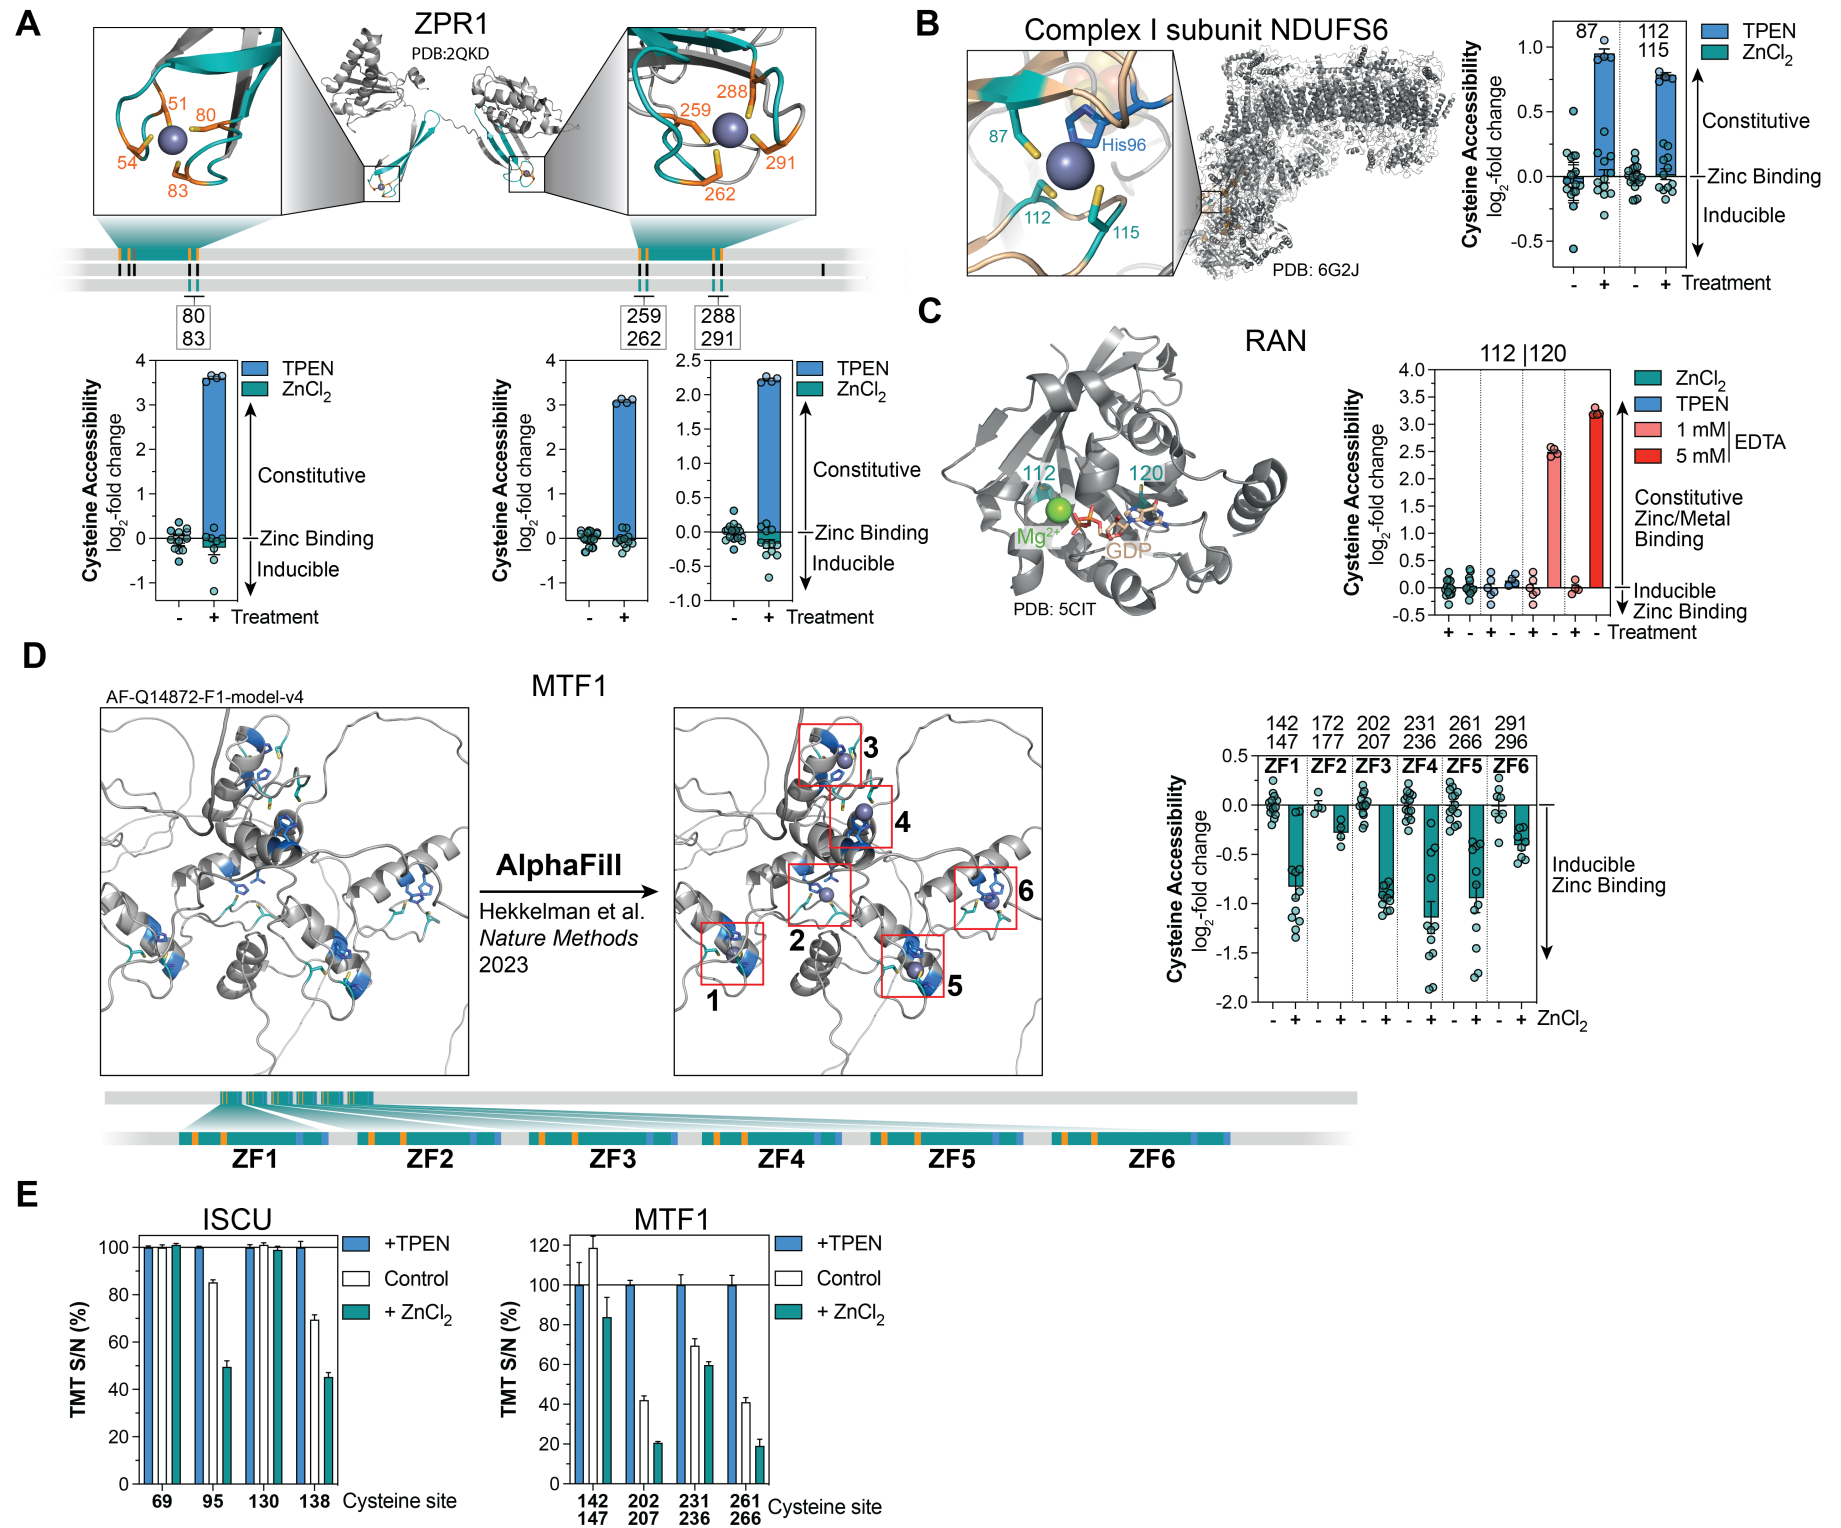

Figure 4

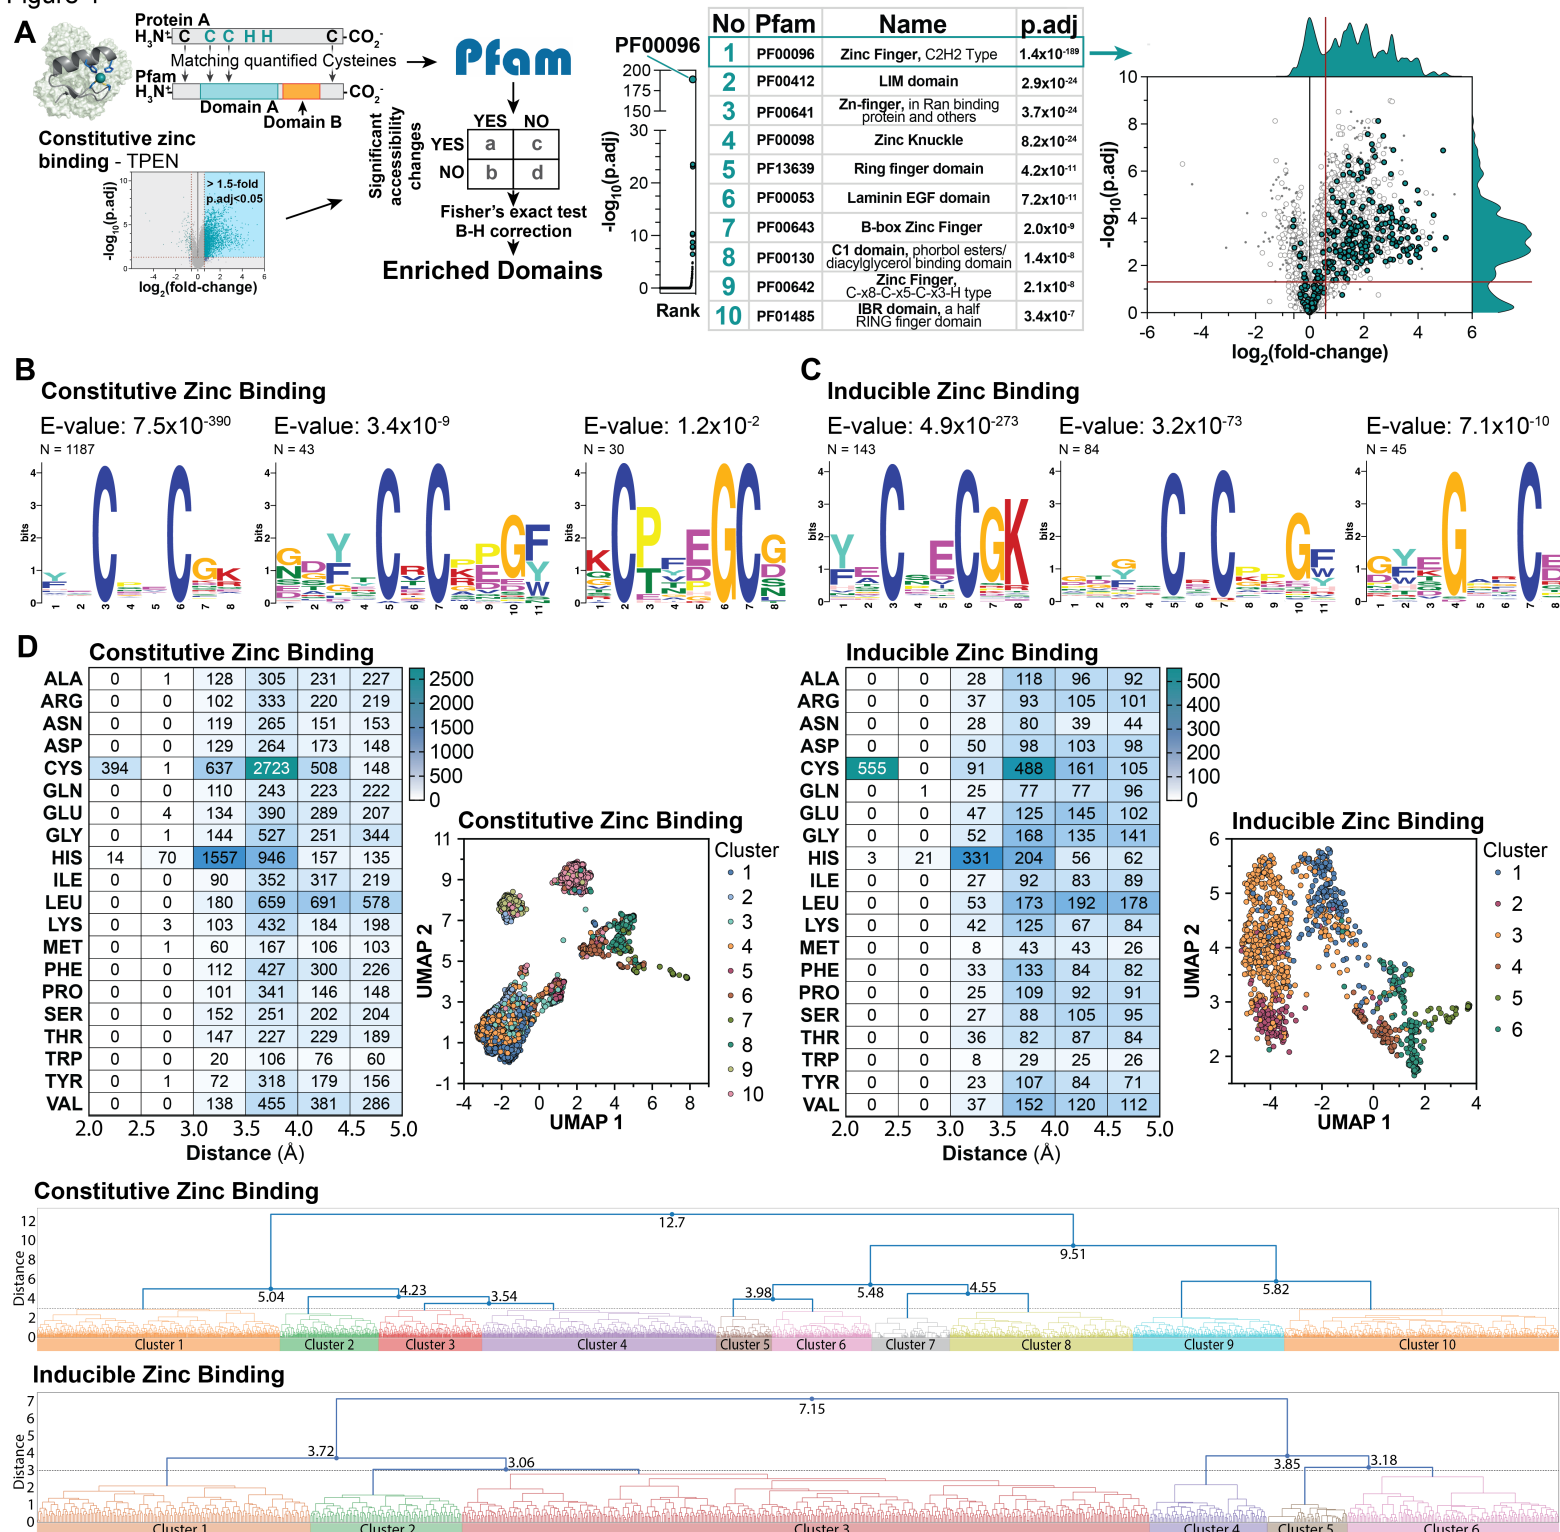

Figure 5

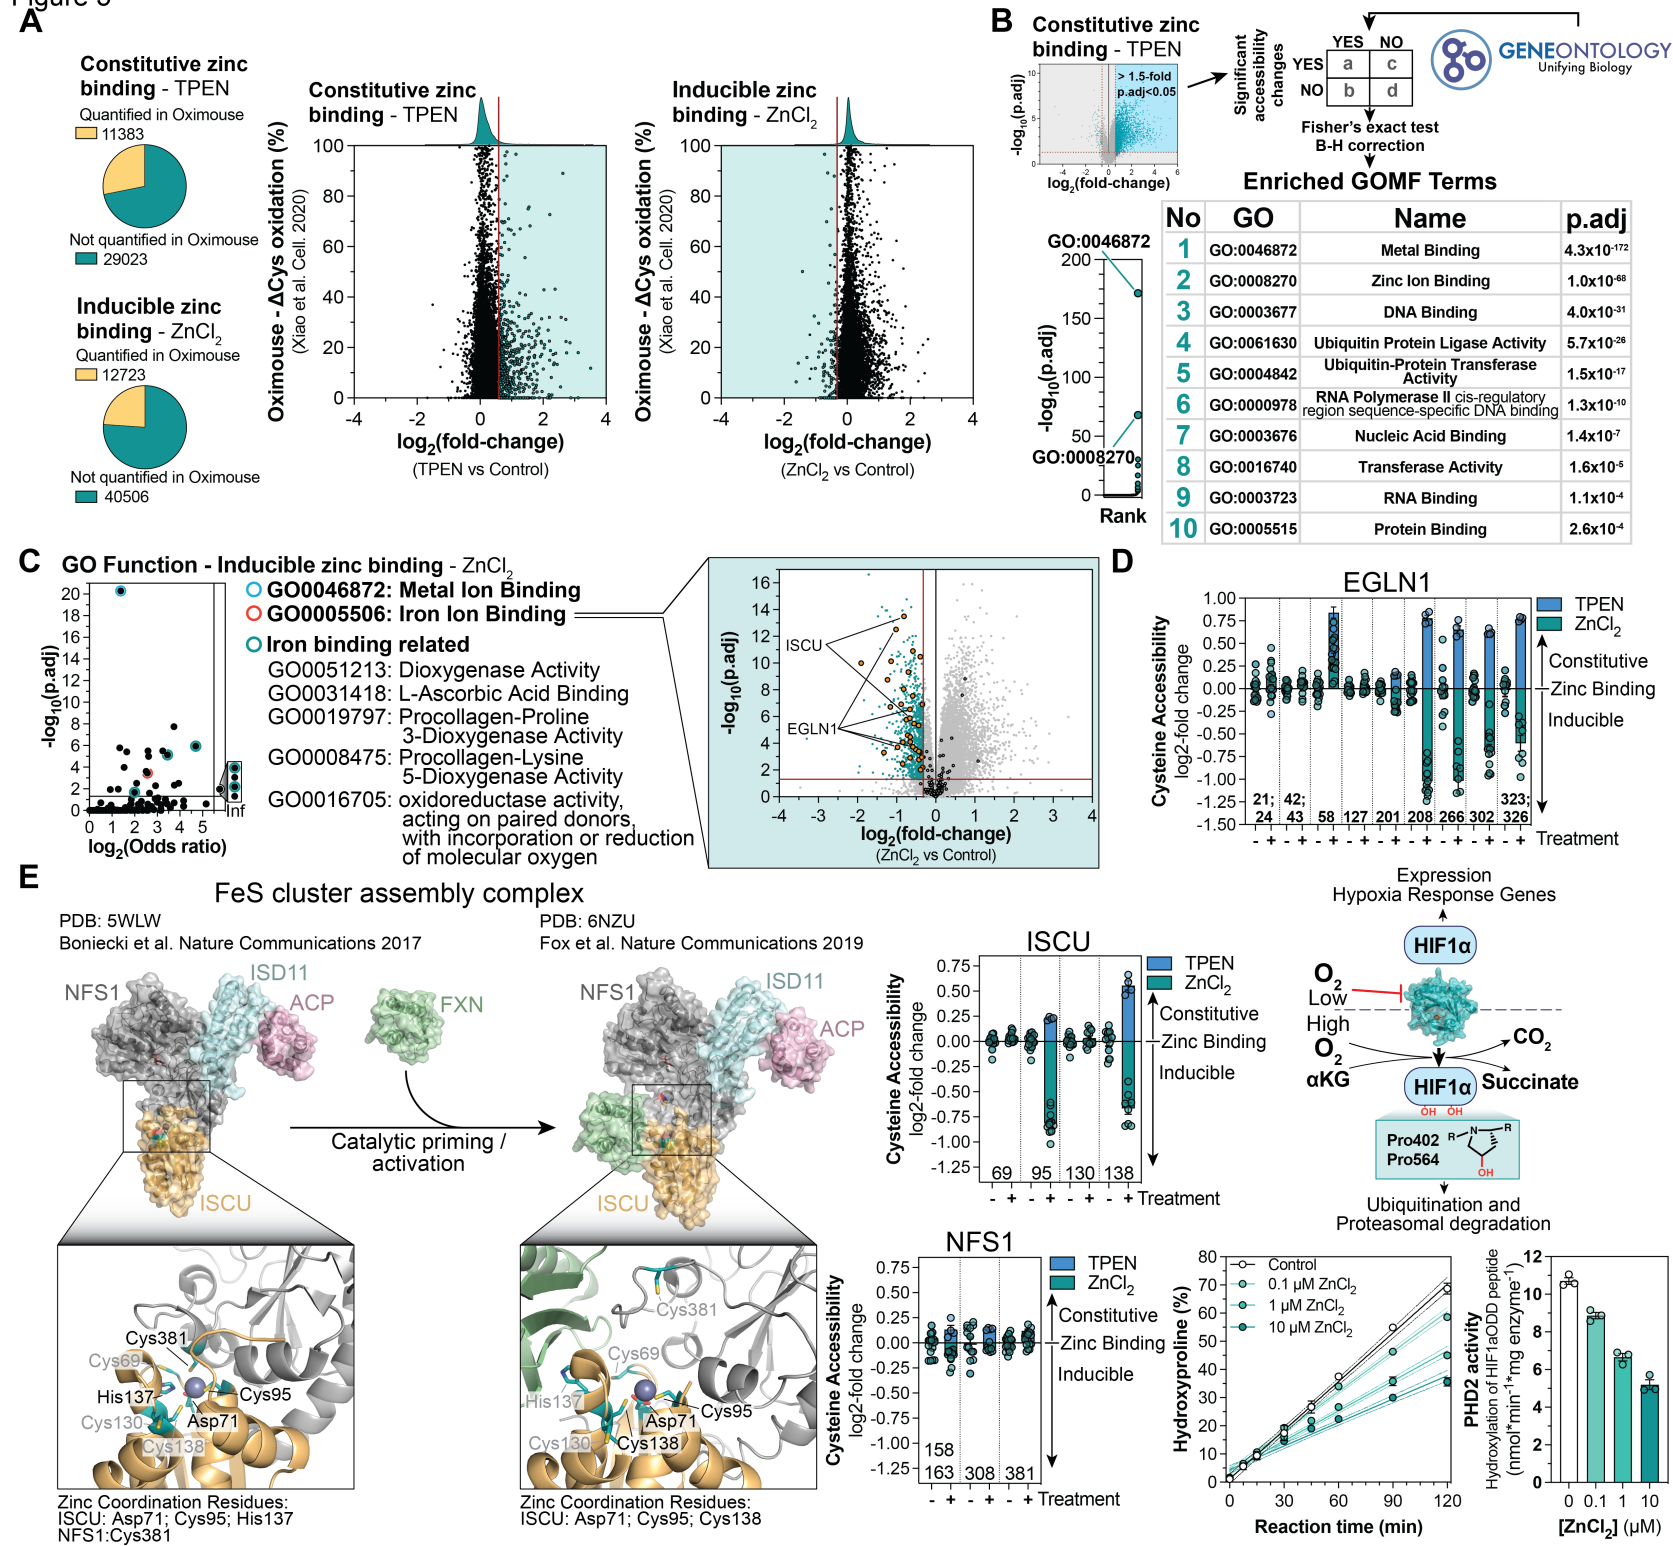

Figure 6

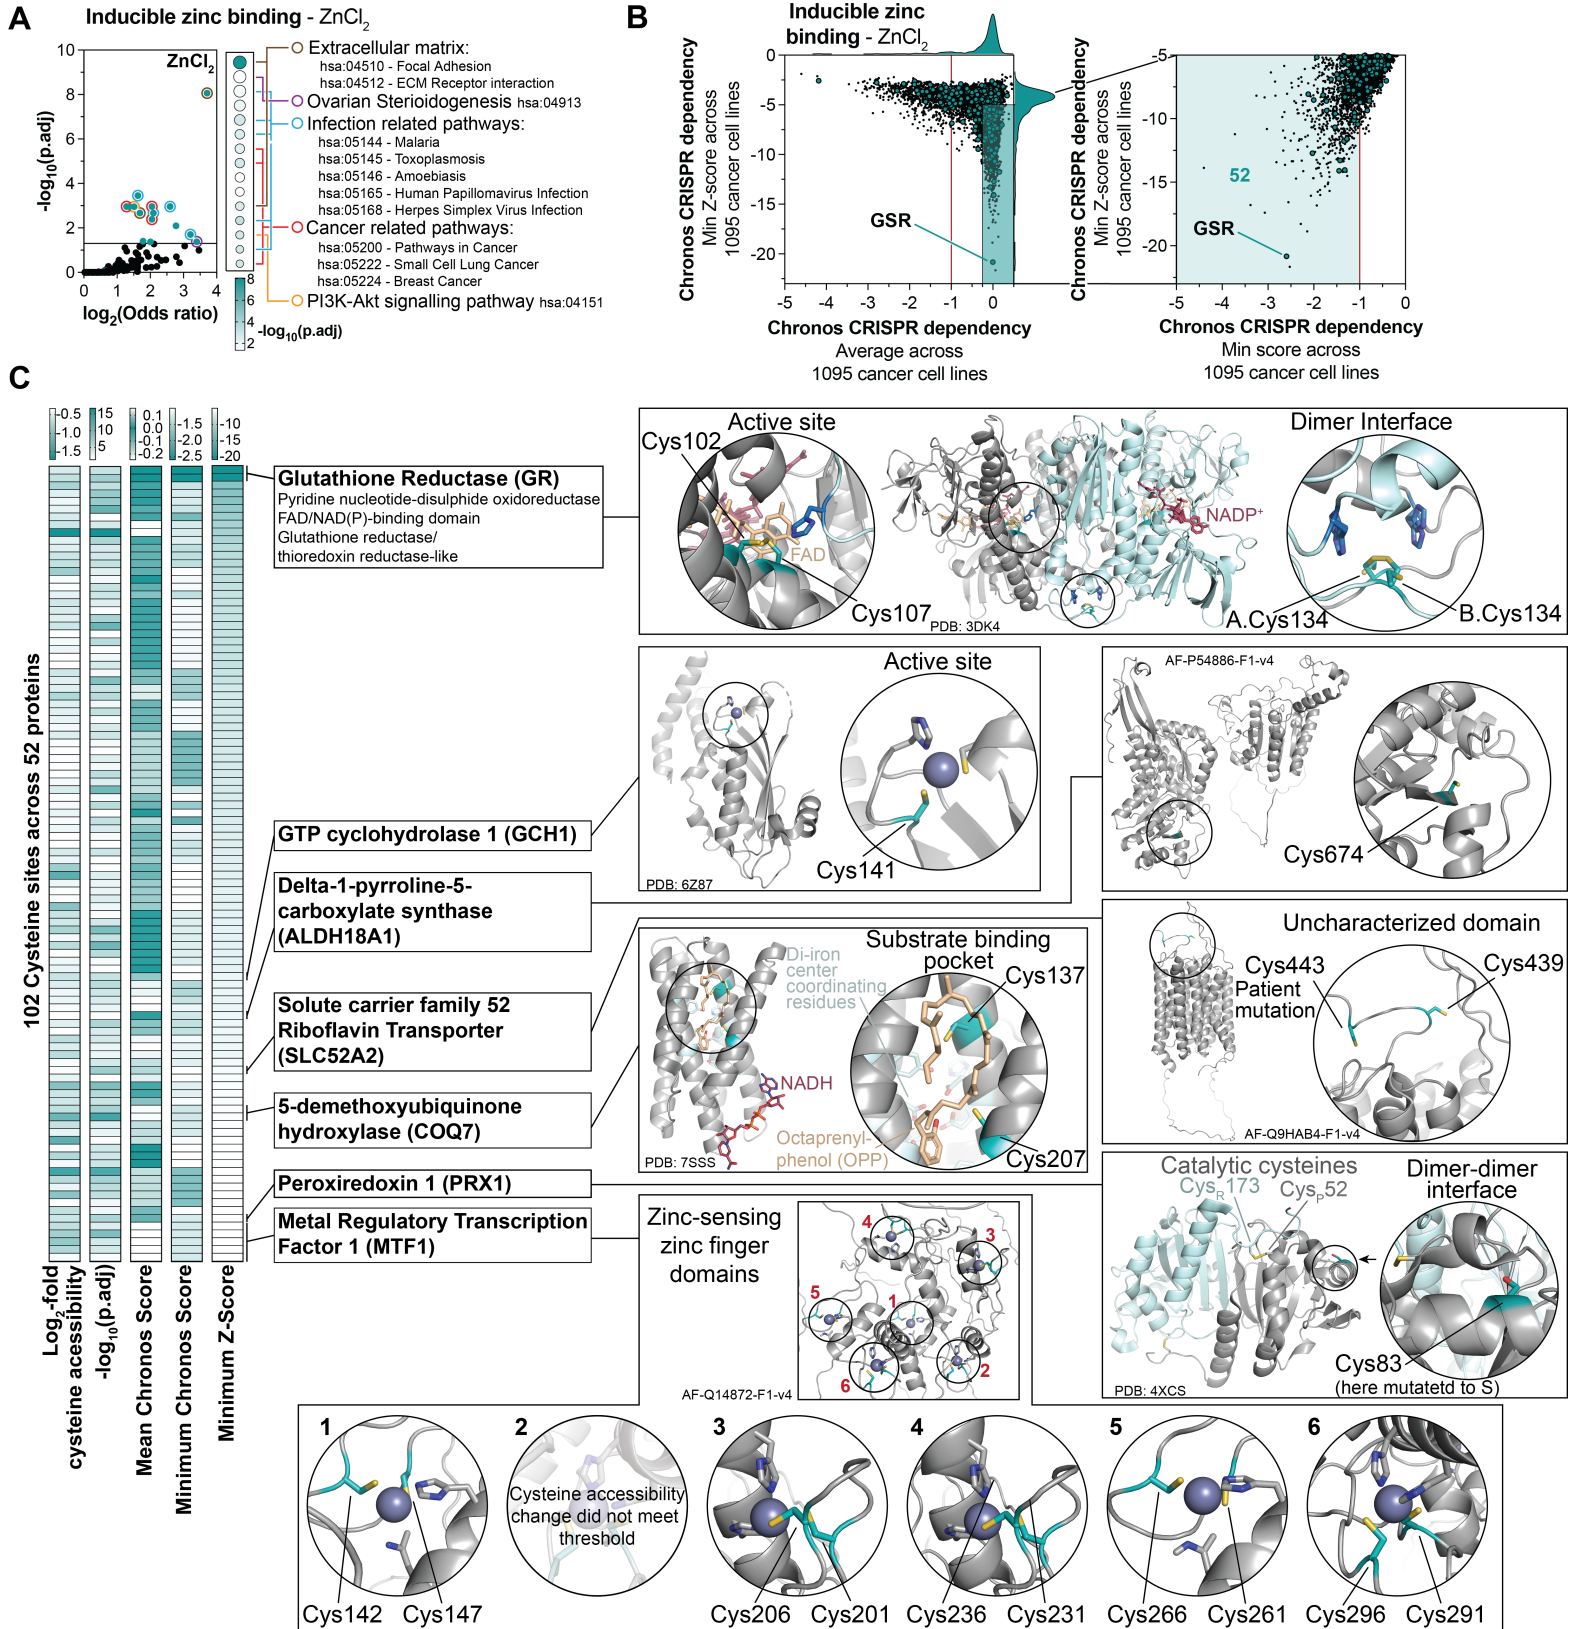



Figure 7

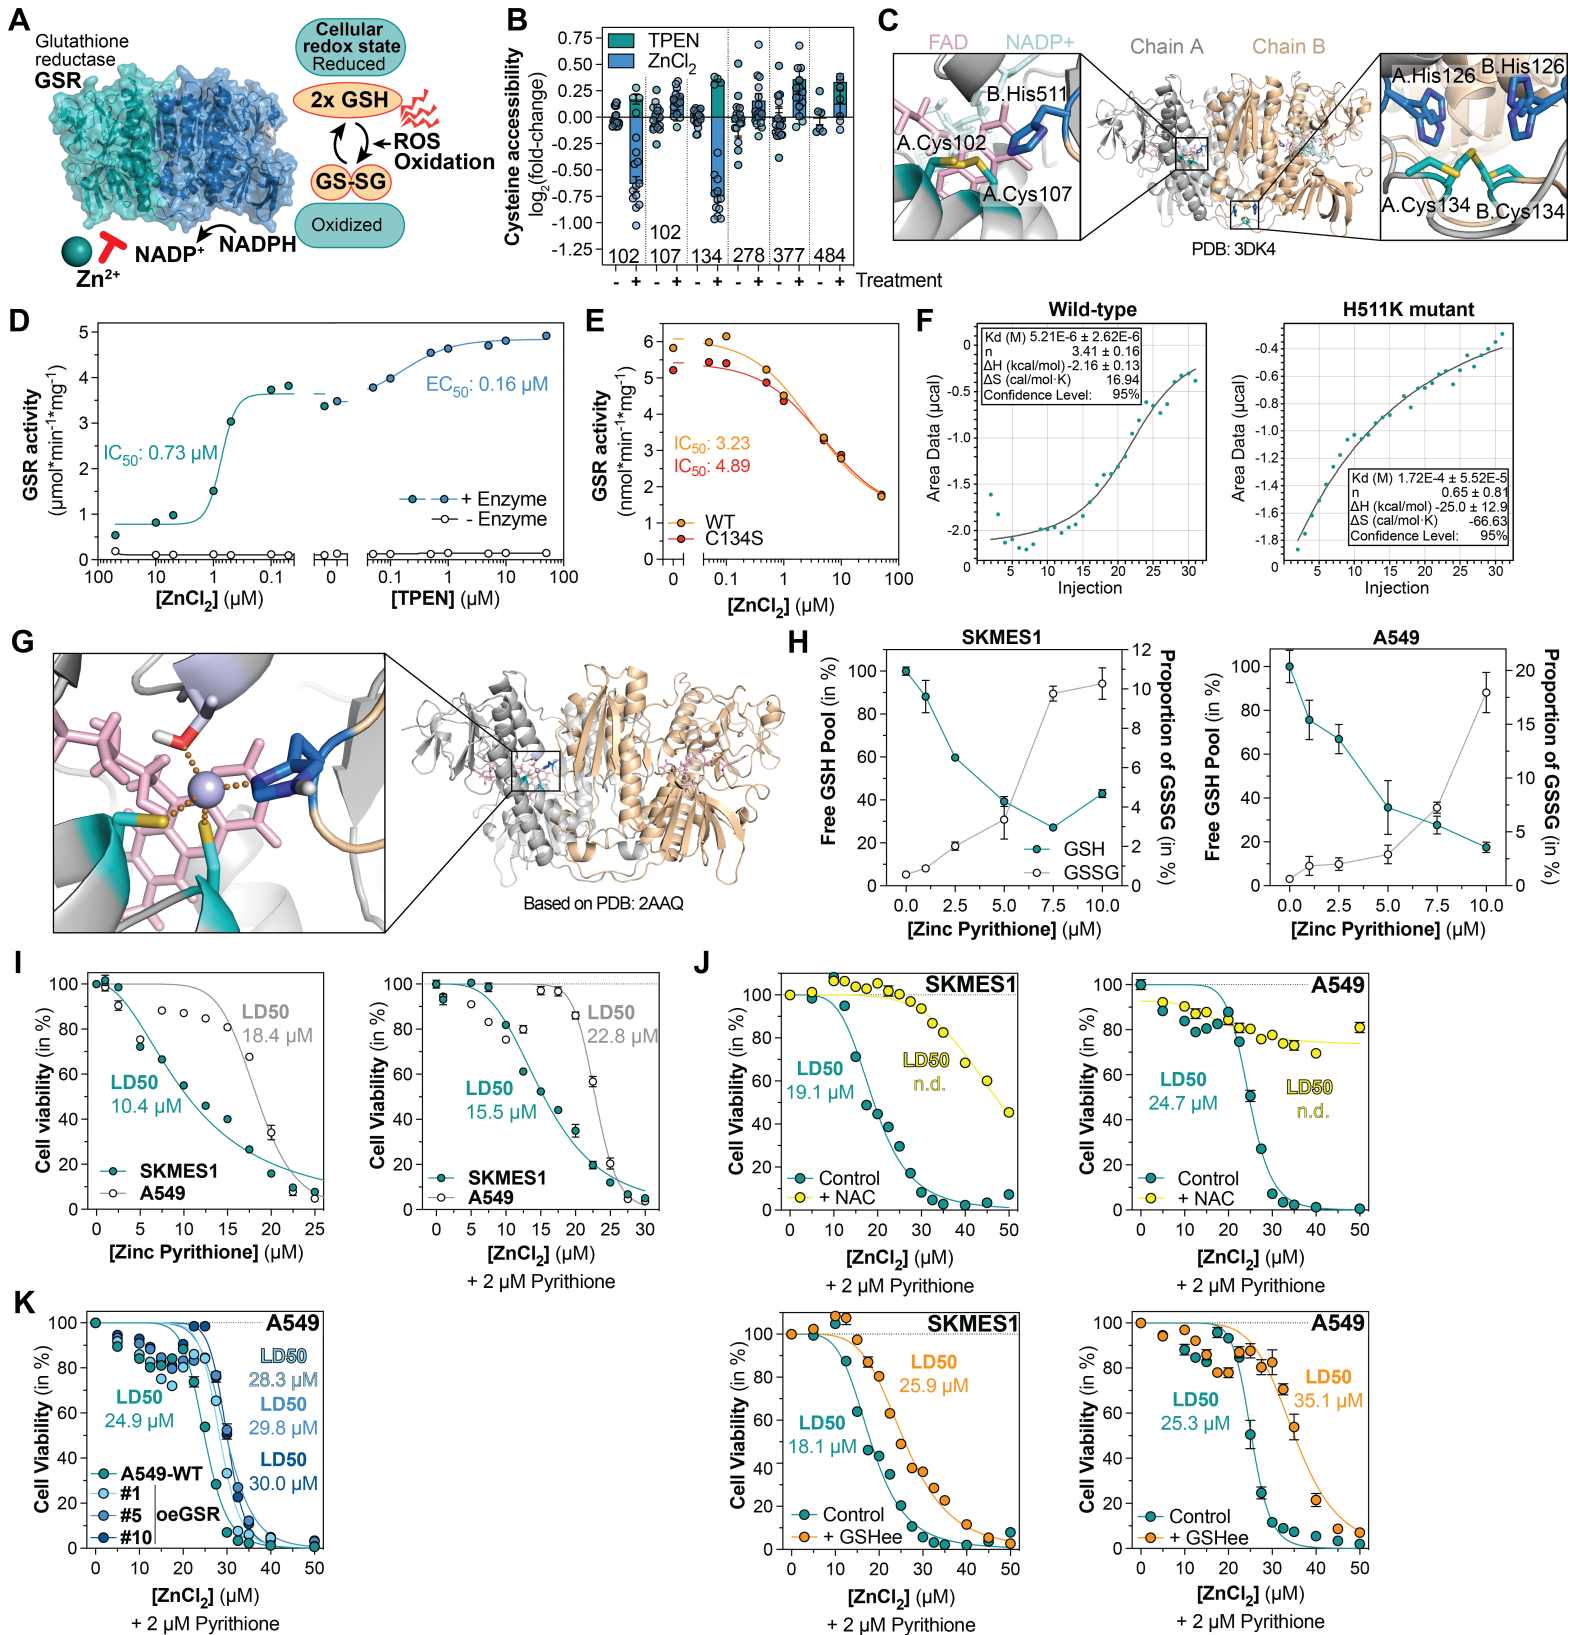



Supplementary Figure 2

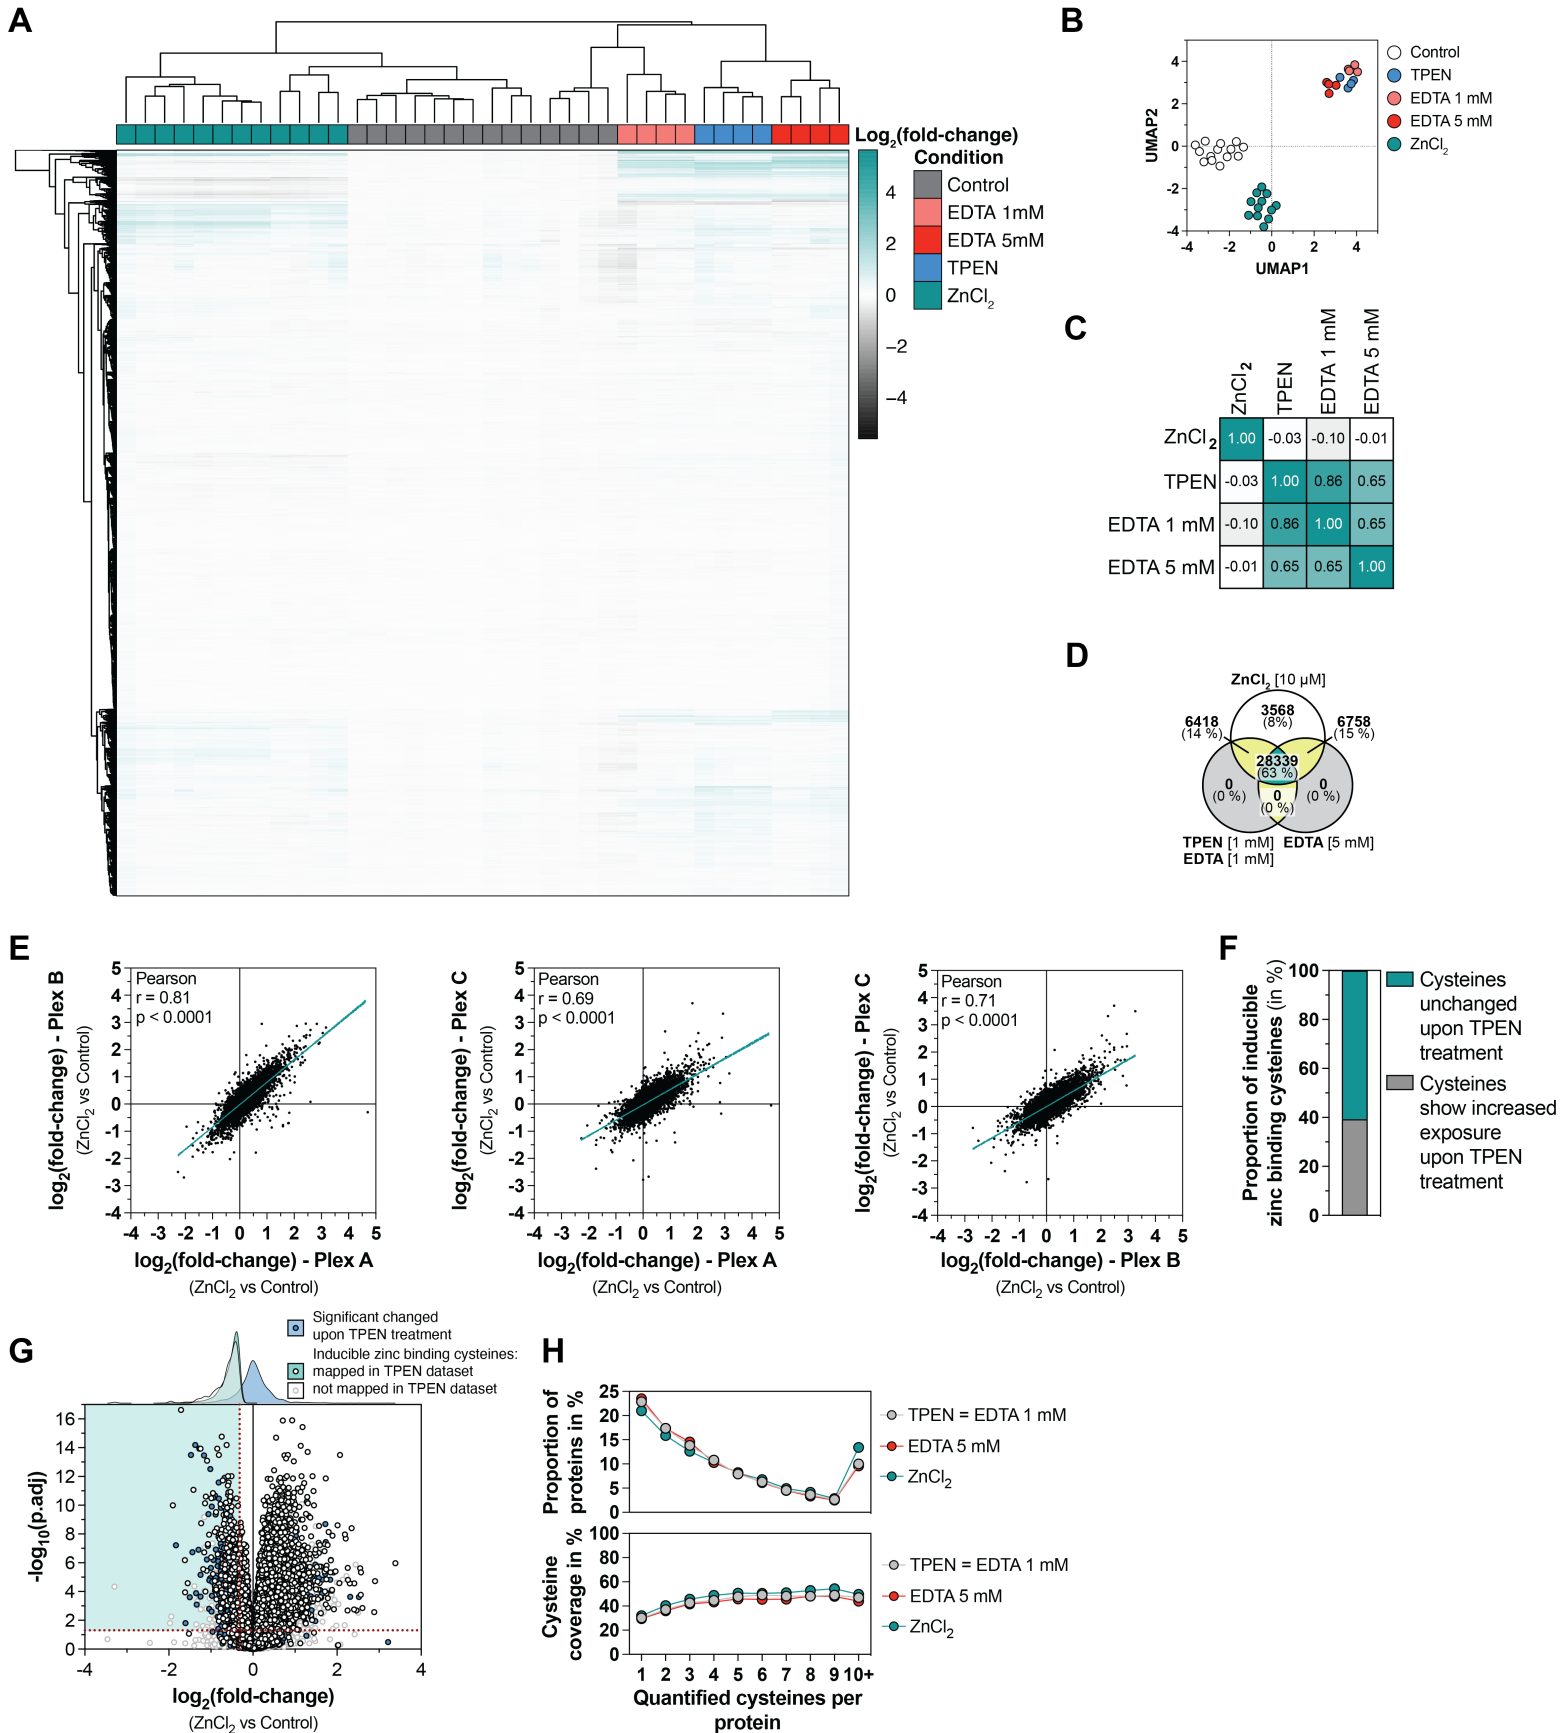

**A**

**Constitutive Zinc Binding**

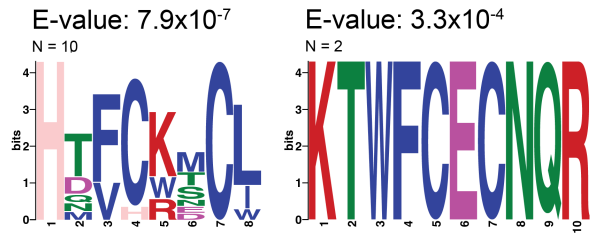

**B**

**Inducible Zinc Binding**

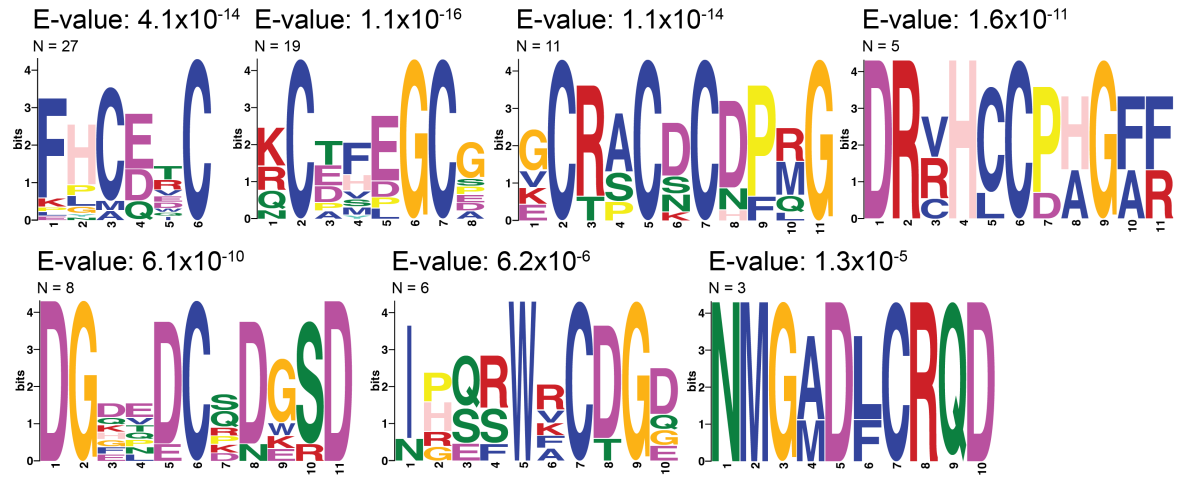

**C**

**Constitutive Zinc Binding**

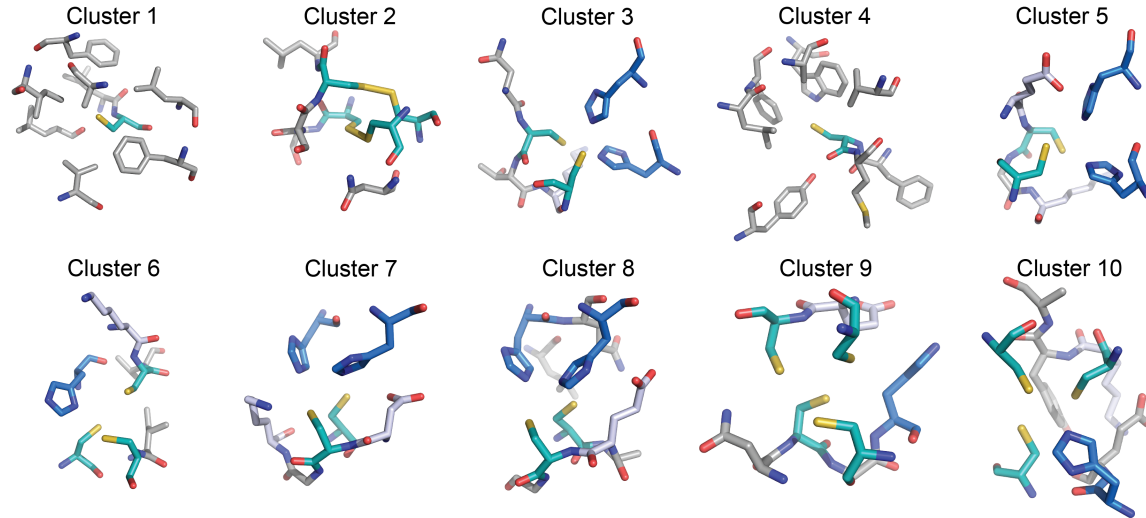

**D**

**Inducible Zinc Binding**

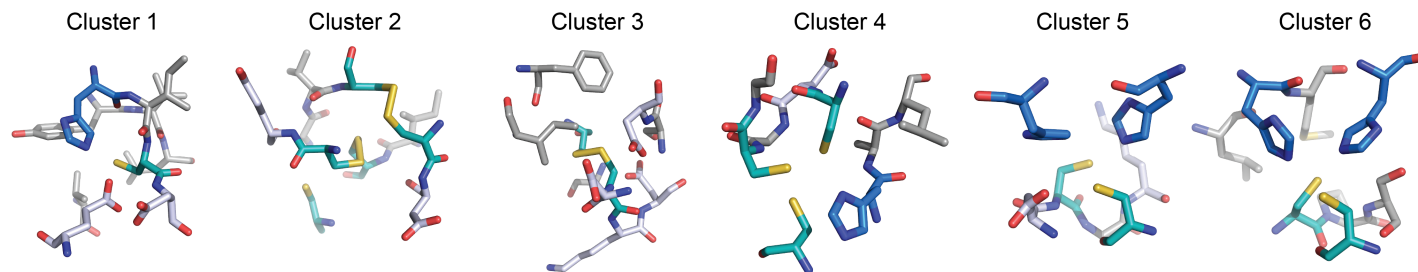

Supplementary Figure 4

**A**

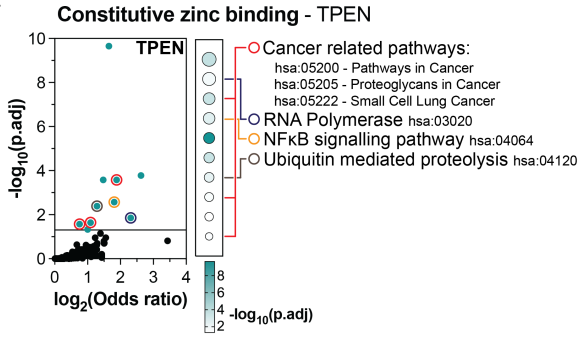

**B**

RNA Polymerase hsa:03020

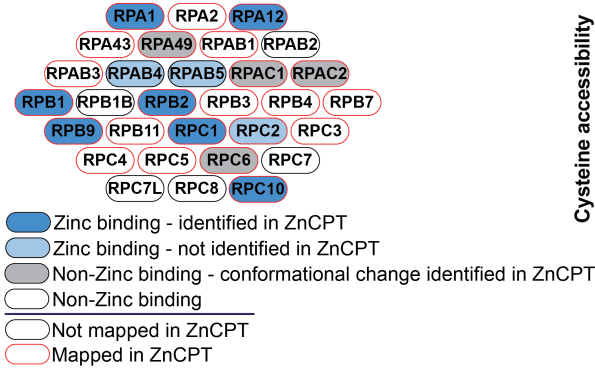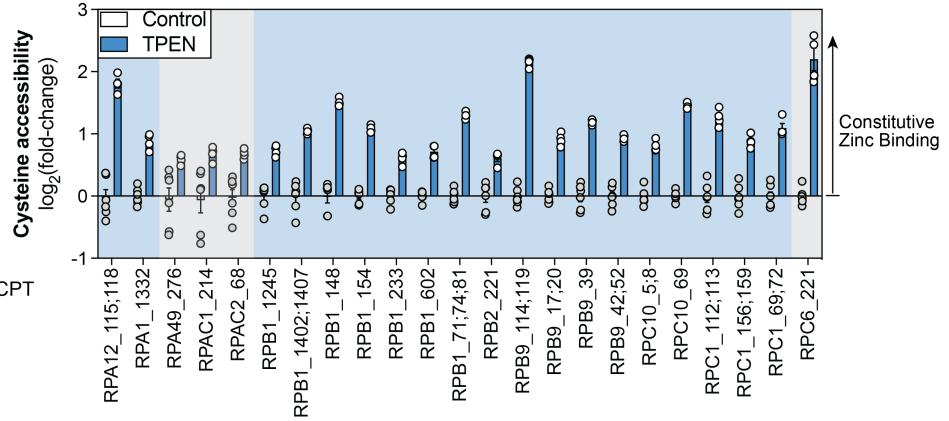

**C**

Ubiquitin mediated proteolysis hsa:04120

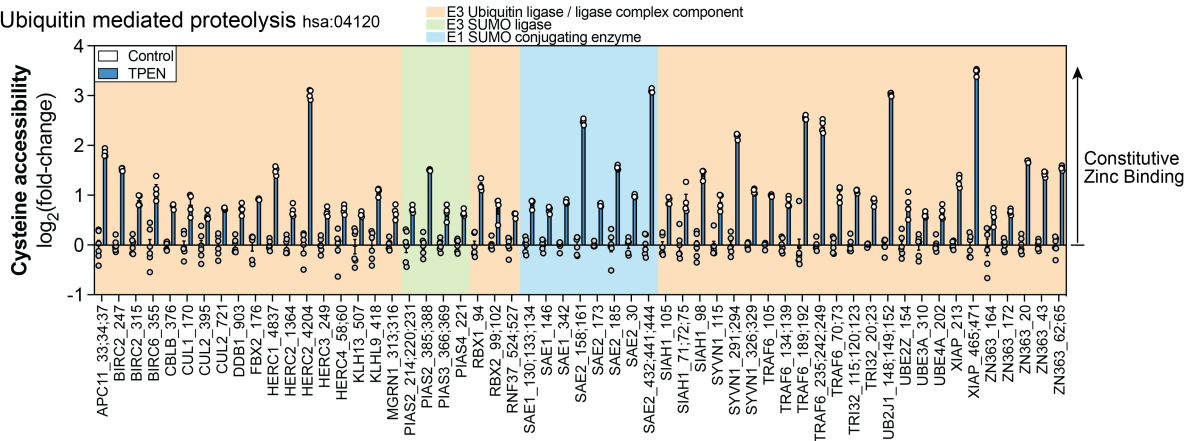

**D**

Cancer related pathways: hsa:05200 - Pathways in Cancer

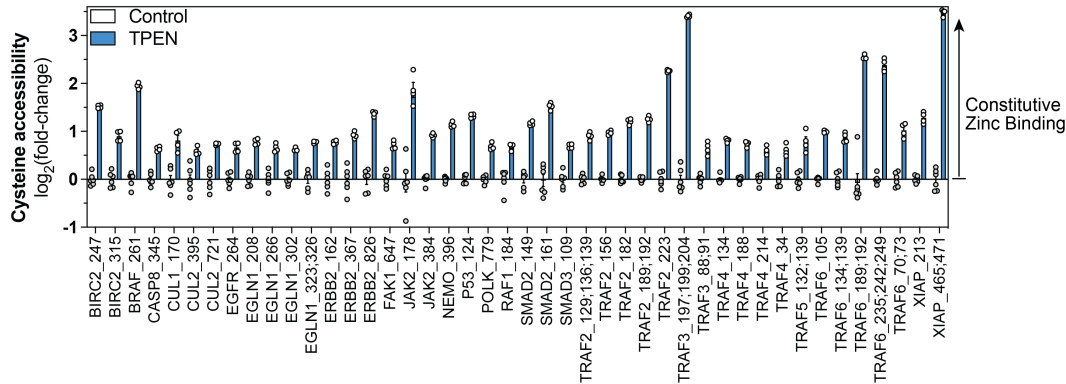



Supplementary Figure 6

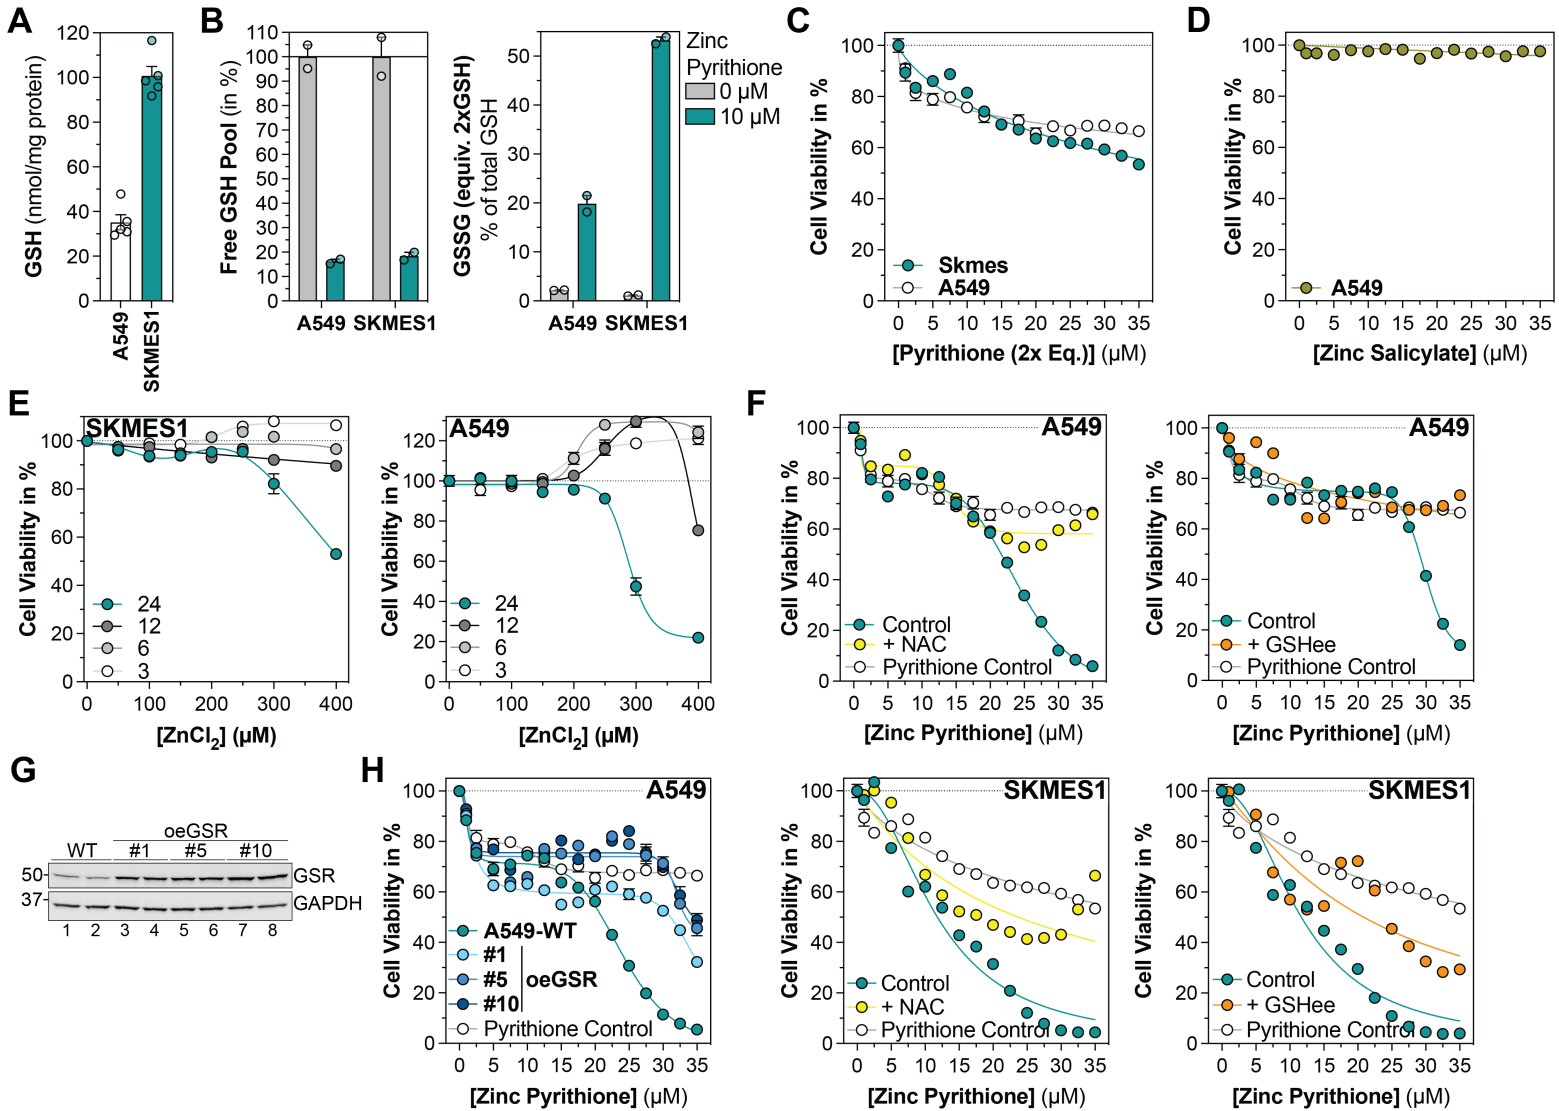

Source: https://www.biorxiv.org/content/biorxiv/early/2024/01/05/2024.01.04.574225.full.pdf
